# Supplementary material
Source: PubMed Central journal article supplement (PMC5068160)

**Supplemental Information:**

**Table S1:** Bacterial species identified in the smokeless tobacco products

| <u>Product</u>      | <u>AR1</u>                        | <u>DC1</u>                       | <u>AR2</u>              | <u>DC2</u>              | <u>AR3</u>              | <u>DC3</u>                  |
|---------------------|-----------------------------------|----------------------------------|-------------------------|-------------------------|-------------------------|-----------------------------|
| Brand A Straight    | <i>Bacillus species</i>           | <i>B. pumilus</i>                | <i>B. pumilus</i>       | <i>B. species</i>       | <i>B. pumilus</i>       | <i>B. species</i>           |
|                     | <i>B. licheniformis</i>           | <i>B. subtilis</i>               | <i>B. safensis</i>      | <i>B. licheniformis</i> | <i>B. safensis</i>      | <i>B. subtilis</i>          |
|                     | <i>B. pumilus</i>                 | <i>B. species</i>                | <i>B. species</i>       | <i>B. safensis</i>      | <i>B. species</i>       | <i>B. licheniformis</i>     |
|                     | <i>B. safensis</i>                | <i>B. safensis</i>               | <i>B. licheniformis</i> | <i>B. pumilus</i>       | <i>B. subtilis</i>      | <i>B. sonorensis</i>        |
|                     |                                   | <i>B. licheniformis</i>          | <i>B. subtilis</i>      | <i>B. altitudinis</i>   | <i>B. licheniformis</i> | <i>B. safensis</i>          |
|                     |                                   | <i>Xanthomonas axonopodis</i>    |                         |                         |                         |                             |
| Brand A Wintergreen | <i>B. licheniformis</i>           | <i>B. pumilus</i>                | <i>B. pumilus</i>       | <i>B. pumilus</i>       | <i>B. species</i>       | <i>B. species</i>           |
|                     | <i>B. subtilis</i>                | <i>B. subtilis</i>               | <i>B. licheniformis</i> | <i>B. species</i>       | <i>B. licheniformis</i> | <i>B. licheniformis</i>     |
|                     | <i>B. amyloliquefaciens</i>       | <i>B. licheniformis</i>          | <i>B. species</i>       | <i>B. safensis</i>      | <i>B. pumilus</i>       | <i>B. sonorensis</i>        |
|                     | <i>B. species</i>                 | <i>B. clausii</i>                | <i>B. safensis</i>      | <i>B. subtilis</i>      | <i>B. safensis</i>      | <i>B. pumilus</i>           |
|                     | <i>B. pumilus</i>                 | <i>B. safensis</i>               | <i>B. aerophilus</i>    | <i>B. tequilensis</i>   |                         |                             |
|                     | <i>B. safensis</i>                | <i>B. species</i>                |                         | <i>B. licheniformis</i> |                         |                             |
|                     | <i>Paenibacillus species</i>      | <i>Thiomargarita namibiensis</i> |                         |                         |                         |                             |
|                     | <i>unclassified Bacillales</i>    |                                  |                         |                         |                         |                             |
|                     |                                   |                                  |                         |                         |                         |                             |
| Brand B Straight    | <i>B. species</i>                 | <i>B. pumilus</i>                | <i>B. pumilus</i>       | <i>B. subtilis</i>      | <i>B. pumilus</i>       | <i>B. species</i>           |
|                     | <i>B. licheniformis</i>           | <i>B. safensis</i>               | <i>B. species</i>       | <i>B. pumilus</i>       | <i>B. species</i>       | <i>B. licheniformis</i>     |
|                     | <i>B. mojavensis</i>              | <i>B. subtilis</i>               | <i>B. licheniformis</i> | <i>B. safensis</i>      | <i>B. licheniformis</i> | <i>B. pumilus</i>           |
|                     | <i>B. amyloliquefaciens</i>       | <i>B. species</i>                | <i>B. safensis</i>      | <i>B. species</i>       | <i>B. safensis</i>      | <i>B. safensis</i>          |
|                     | <i>B. safensis</i>                | <i>B. licheniformis</i>          | <i>B. aerophilus</i>    | <i>B. licheniformis</i> |                         | <i>B. amyloliquefaciens</i> |
|                     | <i>B. subtilis</i>                |                                  | <i>B. aerophilus</i>    |                         |                         | <i>B. subtilis</i>          |
|                     | <i>B. pumilus</i>                 |                                  | <i>B. altitudinis</i>   |                         |                         |                             |
|                     | <i>Tetragenococcus halophilus</i> |                                  |                         |                         |                         |                             |

|                     |                                                                                                                                                                                                 |                                                                                                                                                                        |                                                                                                                                                                                   |                                                                                                                                                |                                                                                                                  |                                                                                                                         |
|---------------------|-------------------------------------------------------------------------------------------------------------------------------------------------------------------------------------------------|------------------------------------------------------------------------------------------------------------------------------------------------------------------------|-----------------------------------------------------------------------------------------------------------------------------------------------------------------------------------|------------------------------------------------------------------------------------------------------------------------------------------------|------------------------------------------------------------------------------------------------------------------|-------------------------------------------------------------------------------------------------------------------------|
|                     | <i>Tetragenococcus species</i>                                                                                                                                                                  |                                                                                                                                                                        |                                                                                                                                                                                   |                                                                                                                                                |                                                                                                                  |                                                                                                                         |
|                     | <i>unclassified Bacillales</i>                                                                                                                                                                  |                                                                                                                                                                        |                                                                                                                                                                                   |                                                                                                                                                |                                                                                                                  |                                                                                                                         |
| Brand B Wintergreen | <i>B. pumilus</i><br><i>B. species</i><br><i>B. safensis</i><br><i>B. licheniformis</i><br><i>Oceanobacillus oncorhynchi</i><br><i>Oceanobacillus species</i><br><i>unclassified Bacillales</i> | <i>B. pumilus</i><br><i>B. species</i><br><i>B. licheniformis</i><br><i>B. subtilis</i><br><i>B. safensis</i>                                                          | <i>B. licheniformis</i><br><i>B. pumilus</i><br><i>B. species</i><br><i>B. subtilis</i><br><i>B. sonorensis</i><br><i>B. aerius</i><br><i>B. safensis</i><br><i>B. aerophilus</i> | <i>B. species</i><br><i>B. pumilus</i><br><i>B. safensis</i><br><i>B. licheniformis</i>                                                        | <i>B. species</i><br><i>B. licheniformis</i><br><i>B. pumilus</i><br><i>B. safensis</i><br><i>B. cereus</i>      | <i>B. species</i><br><i>B. licheniformis</i><br><i>B. pumilus</i><br><i>B. safensis</i>                                 |
| Brand C Wintergreen | <i>B. species</i><br><i>B. pumilus</i><br><i>B. safensis</i><br><i>B. licheniformis</i><br><i>B. subtilis</i><br><i>B. aerophilus</i><br><i>B. sonorensis</i><br><i>unclassified Bacillales</i> | <i>B. species</i><br><i>B. pumilus</i><br><i>B. subtilis</i><br><i>B. safensis</i><br><i>B. licheniformis</i><br><i>B. megaterium</i><br><i>Oceanobacillus species</i> | <i>B. licheniformis</i><br><i>B. pumilus</i><br><i>B. safensis</i><br><i>B. sonorensis</i><br><i>B. species</i><br><i>Brevibacillus species</i><br><i>Terribacillus species</i>   | <i>B. species</i><br><i>B. pumilus</i><br><i>B. megaterium</i><br><i>B. licheniformis</i><br><i>B. sonorensis</i><br><i>B. safensis</i>        | <i>B. species</i><br><i>B. pumilus</i><br><i>B. licheniformis</i><br><i>B. safensis</i>                          | <i>B. species</i><br><i>B. pumilus</i><br><i>B. safensis</i><br><i>B. licheniformis</i><br><i>Paenibacillus species</i> |
| Brand D Straight    | <i>Staphylococcus species</i><br><i>B. pumilus</i><br><i>B. species</i><br><i>B. licheniformis</i><br><i>B. subtilis</i><br><i>B. sonorensis</i><br><i>B. species</i>                           | <i>B. licheniformis</i><br><i>B. species</i><br><i>B. sonorensis</i><br><i>B. pumilus</i><br><i>B. safensis</i><br><i>B. subtilis</i>                                  | <i>B. species</i><br><i>B. pumilus</i><br><i>B. licheniformis</i><br><i>B. sonorensis</i><br><i>B. safensis</i>                                                                   | <i>B. pumilus</i><br><i>B. species</i><br><i>B. sonorensis</i><br><i>B. licheniformis</i><br><i>B. subtilis</i><br><i>Uncultured bacterium</i> | <i>B. species</i><br><i>B. altitudinis</i><br><i>B. pumilus</i><br><i>B. licheniformis</i><br><i>B. subtilis</i> | <i>B. species</i><br><i>B. pumilus</i><br><i>B. safensis</i><br><i>B. licheniformis</i>                                 |

|                      |                                                                                                                                                                                                                       |                                                                                                                                                                                  |                                                                                                                                                                                                        |                                                                                                                                           |                                                                                         |                                                                                                                 |
|----------------------|-----------------------------------------------------------------------------------------------------------------------------------------------------------------------------------------------------------------------|----------------------------------------------------------------------------------------------------------------------------------------------------------------------------------|--------------------------------------------------------------------------------------------------------------------------------------------------------------------------------------------------------|-------------------------------------------------------------------------------------------------------------------------------------------|-----------------------------------------------------------------------------------------|-----------------------------------------------------------------------------------------------------------------|
|                      | <i>unclassified Bacillales</i>                                                                                                                                                                                        |                                                                                                                                                                                  |                                                                                                                                                                                                        |                                                                                                                                           |                                                                                         |                                                                                                                 |
| Brand B Pouches      | <i>B. licheniformis</i><br><i>B. species</i><br><i>B. safensis</i><br><i>B. pumilus</i><br><i>B. subtilis</i><br><i>unclassified Bacillales</i>                                                                       | <i>B. pumilus</i><br><i>B. species</i><br><i>B. safensis</i><br><i>B. clausii</i><br><i>B. licheniformis</i>                                                                     | <i>B. pumilus</i><br><i>B. safensis</i><br><i>B. species</i><br><i>B. subtilis</i><br><i>B. licheniformis</i><br><i>B. aerophilus</i><br><i>Paenibacillus species</i>                                  | <i>B. species</i><br><i>B. pumilus</i><br><i>B. licheniformis</i><br><i>B. safensis</i><br><i>B. altitudinis</i><br><i>B. tequilensis</i> | <i>B. licheniformis</i><br><i>B. species</i><br><i>B. pumilus</i>                       | <i>B. species</i><br><i>B. pumilus</i><br><i>B. safensis</i><br><i>B. sonorensis</i><br><i>B. licheniformis</i> |
| Brand A Pouches      | <i>B. sonorensis</i><br><i>B. species</i><br><i>B. licheniformis</i><br><i>B. safensis</i><br><i>B. pumilus</i><br><i>B. amyloliquefaciens</i><br><i>Tetragenococcus halophilus</i><br><i>unclassified Bacillales</i> | <i>B. aerius</i><br><i>B. licheniformis</i><br><i>B. pumilus</i><br><i>B. safensis</i><br><i>B. species</i><br><i>B. subtilis</i>                                                | <i>B. pumilus</i><br><i>B. species</i><br><i>B. licheniformis</i><br><i>B. safensis</i>                                                                                                                | <i>B. species</i><br><i>B. pumilus</i><br><i>B. safensis</i><br><i>B. subtilis</i><br><i>B. tequilensis</i><br><i>B. licheniformis</i>    | <i>B. species</i><br><i>B. pumilus</i><br><i>B. safensis</i>                            | <i>B. species</i><br><i>B. pumilus</i><br><i>B. sonorensis</i><br><i>B. safensis</i>                            |
| Brand B Mint Pouches | <i>B. licheniformis</i><br><i>B. species</i><br><i>B. safensis</i><br><i>B. pumilus</i><br><i>Tetragenococcus species</i>                                                                                             | <i>B. safensis</i><br><i>B. pumilus</i><br><i>B. licheniformis</i><br><i>B. species</i><br><i>B. circulans</i><br><i>Terribacillus species</i><br><i>Tetragenococcus species</i> | <i>B. aerophilus</i><br><i>B. clausii</i><br><i>B. licheniformis</i><br><i>B. pumilus</i><br><i>B. safensis</i><br><i>B. species</i><br><i>Geobacillus species</i><br><i>Ornithinibacillus species</i> | <i>B. species</i><br><i>B. safensis</i><br><i>B. pumilus</i><br><i>B. aerophilus</i><br><i>Thermus species</i>                            | <i>B. pumilus</i><br><i>B. safensis</i><br><i>B. species</i><br><i>B. licheniformis</i> | <i>B. pumilus</i><br><i>B. safensis</i><br><i>B. sonorensis</i><br><i>B. licheniformis</i><br><i>B. species</i> |

|                         |                                   |                                   |                                   |                                   |                    |                         |
|-------------------------|-----------------------------------|-----------------------------------|-----------------------------------|-----------------------------------|--------------------|-------------------------|
| Brand E Snus Mellow     | <i>B. species</i>                 | <i>B. infantis</i>                | <i>B. pumilus</i>                 | <i>B. pumilus</i>                 | None Identified    | None Identified         |
|                         | <i>B. pumilus</i>                 | <i>B. licheniformis</i>           | <i>B. safensis</i>                |                                   |                    |                         |
|                         | <i>B. licheniformis</i>           | Uncultured bacterium              | <i>Staphylococcus hominis</i>     |                                   |                    |                         |
|                         |                                   | <i>Staphylococcus epidermidis</i> | <i>Staphylococcus epidermidis</i> |                                   |                    |                         |
| Brand F Snus Mint       | <i>B. species</i>                 | <i>Staphylococcus capitis</i>     | <i>Staphylococcus species</i>     | None Identified                   | None Identified    | None Identified         |
|                         |                                   | <i>Staphylococcus hominis</i>     |                                   |                                   |                    |                         |
| Brand B Snus Mint       | <i>B. species</i>                 | <i>B. niabensis</i>               | <i>Oceanobacillus species</i>     | None Identified                   | <i>B. species</i>  | None Identified         |
|                         | <i>Staphylococcus epidermidis</i> |                                   |                                   |                                   | <i>B. safensis</i> |                         |
|                         |                                   |                                   |                                   |                                   | <i>B. pumilus</i>  |                         |
| Brand G Chewing Tobacco | <i>B. pumilus</i>                 | <i>B. species</i>                 | <i>B. pumilus</i>                 | <i>B. pumilus</i>                 | <i>B. pumilus</i>  | <i>B. safensis</i>      |
|                         | <i>B. species</i>                 | <i>B. pumilus</i>                 | <i>B. safensis</i>                | <i>B. species</i>                 | <i>B. species</i>  | <i>B. pumilus</i>       |
|                         | <i>B. safensis</i>                | <i>B. safensis</i>                | <i>B. species</i>                 | <i>B. safensis</i>                |                    | <i>B. licheniformis</i> |
|                         | <i>B. licheniformis</i>           | <i>B. licheniformis</i>           | <i>B. licheniformis</i>           | <i>B. megaterium</i>              |                    | <i>B. species</i>       |
|                         | <i>B. megaterium</i>              | <i>B. subtilis</i>                | <i>B. subtilis</i>                | <i>B. licheniformis</i>           |                    |                         |
|                         | <i>Gracilibacillus species</i>    | <i>B. clausii</i>                 | <i>B. aerophilus</i>              | <i>Oceanobacillus oncorhynchi</i> |                    |                         |
|                         | <i>Oceanobacillus species</i>     | <i>Paenibacillus species</i>      | <i>Oceanobacillus species</i>     |                                   |                    |                         |
|                         |                                   | <i>Geobacillus species</i>        |                                   |                                   |                    |                         |
|                         | <i>Oceanobacillus oncorhynchi</i> |                                   |                                   |                                   |                    |                         |
|                         | <i>Oceanobacillus iheyensis</i>   |                                   |                                   |                                   |                    |                         |
| Brand H Chewing Tobacco | <i>B. licheniformis</i>           | <i>B. clausii</i>                 | <i>B. pumilus</i>                 | <i>B. licheniformis</i>           | None Identified    | <i>B. cereus</i>        |
|                         | <i>B. sonorensis</i>              | <i>B. licheniformis</i>           | <i>Oceanobacillus species</i>     | <i>B. pumilus</i>                 |                    |                         |
|                         | <i>B. species</i>                 | <i>Oceanobacillus species</i>     | <i>B. clausii</i>                 | <i>B. species</i>                 |                    |                         |
|                         | <i>B. pumilus</i>                 |                                   | <i>B. aerophilus</i>              | <i>Micrococcus luteus</i>         |                    |                         |
|                         | <i>Oceanobacillus species</i>     |                                   |                                   | <i>Staphylococcus cohnii</i>      |                    |                         |

|                                      |                                   |                                   |                                   |                                   |                         |                         |
|--------------------------------------|-----------------------------------|-----------------------------------|-----------------------------------|-----------------------------------|-------------------------|-------------------------|
|                                      |                                   |                                   |                                   | <i>Staphylococcus hominis</i>     |                         |                         |
| Brand G Golden Blend Chewing Tobacco | <i>B. species</i>                 | <i>B. clausii</i>                 | <i>B. pumilus</i>                 | <i>B. aerius</i>                  | <i>B. safensis</i>      | <i>B. safensis</i>      |
|                                      | <i>B. licheniformis</i>           | <i>B. species</i>                 | <i>B. safensis</i>                | <i>B. clausii</i>                 | <i>B. pumilus</i>       | <i>B. pumilus</i>       |
|                                      | <i>B. subtilis</i>                | <i>B. licheniformis</i>           | <i>B. subtilis</i>                | <i>B. licheniformis</i>           | <i>B. licheniformis</i> | <i>B. licheniformis</i> |
|                                      | <i>B. pumilus</i>                 | <i>B. pumilus</i>                 | <i>B. species</i>                 | <i>B. pumilus</i>                 |                         | <i>B. species</i>       |
|                                      | <i>B. safensis</i>                | <i>B. safensis</i>                | <i>B. licheniformis</i>           | <i>B. safensis</i>                |                         |                         |
|                                      | <i>Oceanobacillus species</i>     | <i>B. sonorensis</i>              | <i>B. clausii</i>                 | <i>B. species</i>                 |                         |                         |
|                                      | <i>unclassified Bacillales</i>    | <i>Lysinibacillus. fusiformis</i> | <i>Oceanobacillus species</i>     | <i>Oceanobacillus oncorhynchi</i> |                         |                         |
|                                      |                                   | <i>Paenibacillus species</i>      | <i>Oceanobacillus oncorhynchi</i> |                                   |                         |                         |
|                                      |                                   | <i>Oceanobacillus species</i>     |                                   |                                   |                         |                         |
|                                      |                                   | <i>Oceanobacillus iheyensis</i>   |                                   |                                   |                         |                         |
|                                      | <i>Staphylococcus epidermidis</i> |                                   |                                   |                                   |                         |                         |

**Note:** Colors are shown to highlight major taxonomic groups. The light purple highlighted isolates are those that did not fall into another major group.

**Table S2: MG-RAST Accession Information and Sequence Counts**

| <b>Sample</b>           | <b>Sample ID</b> | <b>Metagenome Name</b> | <b>MG-RAST Accession #: V1/V2</b> | <b>Sequence Count: V1/V2</b> | <b>Shannon Diversity Index: V2</b> | <b>MG-RAST Accession #: V6</b> | <b>Sequence Count: V6</b> | <b>Shannon Diversity Index: V6</b> |
|-------------------------|------------------|------------------------|-----------------------------------|------------------------------|------------------------------------|--------------------------------|---------------------------|------------------------------------|
| Brand A Straight AR1    | AR1_1            | NCTR1                  | 4573045.3                         | 6,765                        | 4.73                               | 4582872.3                      | 13,717                    | 4.55                               |
| Brand A Straight AR2    | AR2_1            | NCTR17                 | 4573052.3                         | 56,203                       | 4.26                               | 4582879.3                      | 30,407                    | 12.38                              |
| Brand A Straight AR3    | AR3_1            | NCTR32                 | 4573069.3                         | 17,700                       | 3.80                               | 4582896.3                      | 53,568                    | 10.95                              |
| Brand A Straight DC1    | DC1_1            | CTP1                   | 4573000.3                         | 16,262                       | 4.78                               | 4582827.3                      | 9,955                     | 1.74                               |
| Brand A Straight DC2    | DC2_1            | CTP25                  | 4573017.3                         | 17,858                       | 4.83                               | 4582844.3                      | 38,942                    | 10.89                              |
| Brand A Straight DC3    | DC3_1            | CTP31                  | 4573024.3                         | 18,627                       | 4.17                               | 4582851.3                      | 45                        | 7.48                               |
| Brand A Wintergreen AR1 | AR1_2            | NCTR2                  | 4573055.3                         | 11,809                       | 2.83                               | 4582882.3                      | 11,333                    | 11.14                              |
| Brand A Wintergreen AR2 | AR2_2            | NCTR18                 | 4573053.3                         | 19,374                       | 5.93                               | 4582880.3                      | 17,982                    | 11.53                              |
| Brand A Wintergreen AR3 | AR3_2            | NCTR33                 | 4573070.3                         | 2,942                        | 12.78                              | 4582897.3                      | 20,652                    | 12.36                              |
| Brand A Wintergreen DC1 | DC1_2            | CTP2                   | 4573011.3                         | 12,267                       | 2.40                               | 4582838.3                      | 18,193                    | 5.44                               |
| Brand A Wintergreen DC2 | DC2_2            | CTP17                  | 4573008.3                         | 45,400                       | 4.03                               | 4582835.3                      | 27,024                    | 9.06                               |
| Brand A Wintergreen DC3 | DC3_2            | CTP33                  | 4573026.3                         | 24,327                       | 2.27                               | 4582853.3                      | 34,251                    | 11.60                              |
| Brand B Straight AR1    | AR1_3            | NCTR3                  | 4573066.3                         | 6,945                        | 7.52                               | 4582893.3                      | 12,476                    | 6.03                               |
| Brand B Straight AR2    | AR2_3            | NCTR19                 | 4573054.3                         | 60,792                       | 6.46                               | 4582881.3                      | 21,146                    | 9.22                               |
| Brand B Straight AR3    | AR3_3            | NCTR34                 | 4573071.3                         | 8,485                        | 16.78                              | 4582898.3                      | 11,971                    | 10.44                              |

|                            |       |        |           |        |       |           |        |       |
|----------------------------|-------|--------|-----------|--------|-------|-----------|--------|-------|
| Brand B Straight<br>DC1    | DC1_3 | CTP3   | 4573022.3 | 15,791 | 3.32  | 4582849.3 | 16,745 | 1.37  |
| Brand B Straight<br>DC2    | DC2_3 | CTP18  | 4573009.3 | 23,108 | 4.35  | 4582836.3 | 26,501 | 7.83  |
| Brand B Straight<br>DC3    | DC3_3 | CTP32  | 4573025.3 | 19,785 | 3.04  | 4582852.3 | 39,607 | 6.82  |
| Brand B<br>Wintergreen AR1 | AR1_4 | NCTR4  | 4573077.3 | 7,190  | 2.65  | 4582904.3 | 9,934  | 5.61  |
| Brand B<br>Wintergreen AR2 | AR2_4 | NCTR20 | 4573056.3 | 15,127 | 6.61  | 4582883.3 | 20,874 | 13.27 |
| Brand B<br>Wintergreen AR3 | AR3_4 | NCTR35 | 4573072.3 | 28,242 | 6.32  | 4582899.3 | 20,501 | 13.29 |
| Brand B<br>Wintergreen DC1 | DC1_4 | CTP4   | 4573033.3 | 14,598 | 2.33  | 4582860.3 | 12,256 | 2.17  |
| Brand B<br>Wintergreen DC2 | DC2_4 | CTP19  | 4573010.3 | 6,375  | 12.70 | 4582837.3 | 28,175 | 9.58  |
| Brand B<br>Wintergreen DC3 | DC3_4 | CTP34  | 4573027.3 | 17,390 | 3.34  | 4582854.3 | 11,262 | 11.19 |
| Brand C<br>Wintergreen AR1 | AR1_5 | NCTR6  | 4573086.3 | 9,713  | 11.12 | 4582913.3 | 11,448 | 10.86 |
| Brand C<br>Wintergreen AR2 | AR2_5 | NCTR21 | 4573057.3 | 11,049 | 6.56  | 4582884.3 | 12,425 | 10.59 |
| Brand C<br>Wintergreen AR3 | AR3_5 | NCTR36 | 4573073.3 | 34,846 | 11.14 | 4582900.3 | 20,957 | 11.74 |
| Brand C<br>Wintergreen DC1 | DC1_5 | CTP9   | 4573044.3 | 26     | 1.00  | 4582871.3 | 9,099  | 12.43 |
| Brand C<br>Wintergreen DC2 | DC2_5 | CTP24  | 4573016.3 | 14,259 | 9.76  | 4582843.3 | 17,227 | 11.77 |
| Brand C<br>Wintergreen DC3 | DC3_5 | CTP35  | 4573028.3 | 24,232 | 5.76  | 4582855.3 | 64,404 | 13.10 |
| Brand D Straight<br>AR1    | AR1_6 | NCTR7  | 4573087.3 | 14,041 | 5.19  | 4582914.3 | 11,273 | 12.75 |
| Brand D Straight<br>AR2    | AR2_6 | NCTR22 | 4573058.3 | 2,519  | 6.99  | 4582885.3 | 15,634 | 7.51  |
| Brand D Straight<br>AR3    | AR3_6 | NCTR37 | 4573074.3 | 16,226 | 12.56 | 4582901.3 | 46,772 | 9.11  |

|                          |       |        |           |        |       |           |        |       |
|--------------------------|-------|--------|-----------|--------|-------|-----------|--------|-------|
| AR3                      |       |        |           |        |       |           |        |       |
| Brand D Straight DC1     | DC1_6 | CTP5   | 4573040.3 | 9,543  | 3.27  | 4582867.3 | 14,137 | 2.96  |
| Brand D Straight DC2     | DC2_6 | CTP20  | 4573012.3 | 15,308 | 7.23  | 4582839.3 | 24,896 | 10.14 |
| Brand D Straight DC3     | DC3_6 | CTP36  | 4573029.3 | 21,234 | 7.24  | 4582856.3 | 8,241  | 9.41  |
| Brand B Pouches AR1      | AR1_7 | NCTR8  | 4573088.3 | 39,161 | 10.12 | 4582915.3 | 10,870 | 5.30  |
| Brand B Pouches AR2      | AR2_7 | NCTR23 | 4573059.3 | 14,699 | 11.58 | 4582886.3 | 26,794 | 10.32 |
| Brand B Pouches AR3      | AR3_7 | NCTR38 | 4573075.3 | 26,886 | 10.50 | 4582902.3 | 27,548 | 13.73 |
| Brand B Pouches DC1      | DC1_7 | CTP6   | 4573041.3 | 13,037 | 2.45  | 4582868.3 | 13,020 | 3.08  |
| Brand B Pouches DC2      | DC2_7 | CTP21  | 4573013.3 | 27,726 | 3.72  | 4582840.3 | 22,190 | 4.32  |
| Brand B Pouches DC3      | DC3_7 | CTP38  | 4573031.3 | 26,322 | 9.35  | 4582858.3 | 12,384 | 9.63  |
| Brand A Pouches AR1      | AR1_8 | NCTR9  | 4573089.3 | 9,258  | 3.27  | 4582916.3 | 13,538 | 6.99  |
| Brand A Pouches AR2      | AR2_8 | NCTR24 | 4573060.3 | 98,786 | 15.06 | 4582887.3 | 36,552 | 11.21 |
| Brand A Pouches AR3      | AR3_8 | NCTR39 | 4573076.3 | 26,562 | 8.79  | 4582903.3 | 23,577 | 10.71 |
| Brand A Pouches DC1      | DC1_8 | CTP10  | 4573001.3 | 14,740 | 2.65  | 4582828.3 | 11,097 | 9.31  |
| Brand A Pouches DC2      | DC2_8 | CTP16  | 4573007.3 | 47,752 | 4.90  | 4582834.3 | 20     | 7.00  |
| Brand A Pouches DC3      | DC3_8 | CTP37  | 4573030.3 | 25,639 | 12.36 | 4582857.3 | 37,162 | 13.54 |
| Brand B Mint Pouches AR1 | AR1_9 | NCTR41 | 4574738.3 | 1,087  | 4.80  | 4582911.3 | 12,007 | 12.69 |
| Brand B Mint Pouches AR2 | AR2_9 | NCTR25 | 4573061.3 | 64,245 | 8.87  | 4582888.3 | 30,770 | 9.37  |



|                             |        |        |           |        |       |           |        |       |
|-----------------------------|--------|--------|-----------|--------|-------|-----------|--------|-------|
| Brand B Mint<br>Pouches AR3 | AR3_9  | NCTR40 | 4573078.3 | 25,706 | 8.03  | 4582905.3 | 13,644 | 14.51 |
| Brand B Mint<br>Pouches DC1 | DC1_9  | CTP11  | 4573002.3 | 12,238 | 5.12  | 4582829.3 | 10,097 | 3.83  |
| Brand B Mint<br>Pouches DC2 | DC2_9  | CTP26  | 4573018.3 | 29,321 | 4.21  | 4582845.3 | 48,986 | 11.93 |
| Brand B Mint<br>Pouches DC3 | DC3_9  | CTP39  | 4573032.3 | 26,684 | 2.99  | 4582859.3 | 16,517 | 14.27 |
| Brand E Snus<br>Mellow AR1  | AR1_10 | NCTR10 | 4573046.3 | 10,256 | 1.80  | 4582873.3 | 13,222 | 12.83 |
| Brand E Snus<br>Mellow AR2  | AR2_10 | NCTR26 | 4573062.3 | 7,508  | 6.10  | 4582889.3 | 23,182 | 9.47  |
| Brand E Snus<br>Mellow AR3  | AR3_10 | NCTR42 | 4573080.3 | 18,799 | 8.70  | 4582906.3 | 14,370 | 8.86  |
| Brand E Snus<br>Mellow DC1  | DC1_10 | CTP7   | 4573042.3 | 10,502 | 8.52  | 4582869.3 | 9,354  | 10.38 |
| Brand E Snus<br>Mellow DC2  | DC2_10 | CTP22  | 4573014.3 | 27,993 | 9.69  | 4582841.3 | 22,568 | 10.18 |
| Brand E Snus<br>Mellow DC3  | DC3_10 | CTP40  | 4573034.3 | 18,002 | 2.50  | 4582861.3 | 12,672 | 10.13 |
| Brand F Snus Mint<br>AR1    | AR1_11 | NCTR11 | 4573047.3 | 5,907  | 5.95  | 4582874.3 | 14,783 | 13.90 |
| Brand F Snus Mint<br>AR2    | AR2_11 | NCTR27 | 4573063.3 | 7,287  | 3.97  | 4582890.3 | 15,594 | 8.54  |
| Brand F Snus Mint<br>AR3    | AR3_11 | NCTR43 | 4573081.3 | 21,958 | 10.78 | 4582907.3 | 14,760 | 7.12  |
| Brand F Snus Mint<br>DC1    | DC1_11 | CTP15  | 4573006.3 | 32,965 | 11.44 | 4582833.3 | 22,321 | 4.81  |
| Brand F Snus Mint<br>DC2    | DC2_11 | CTP30  | 4573023.3 | 14,899 | 7.31  | 4582850.3 | 20,100 | 9.14  |
| Brand F Snus Mint<br>DC3    | DC3_11 | CTP41  | 4573035.3 | 20,333 | 14.82 | 4582862.3 | 27,479 | 11.33 |
| Brand B Snus Mint<br>AR1    | AR1_12 | NCTR12 | 4573048.3 | 9,001  | 2.95  | 4582875.3 | 14,980 | 12.21 |
| Brand B Snus Mint<br>AR2    | AR2_12 | NCTR28 | 4573064.3 | 11,190 | 5.53  | 4582891.3 | 26,663 | 8.83  |

|                   |        |        |           |         |       |           |        |       |
|-------------------|--------|--------|-----------|---------|-------|-----------|--------|-------|
| AR2               |        |        |           |         |       |           |        |       |
| Brand B Snus Mint |        |        |           |         |       |           |        |       |
| AR3               | AR3_12 | NCTR44 | 4573082.3 | 30,919  | 11.14 | 4582908.3 | 15,525 | 7.89  |
| Brand B Snus Mint |        |        |           |         |       |           |        |       |
| DC1               | DC1_12 | CTP12  | 4573003.3 | 3,612   | 7.75  | 4582830.3 | 13,619 | 13.00 |
| Brand B Snus Mint |        |        |           |         |       |           |        |       |
| DC2               | DC2_12 | CTP27  | 4573019.3 | 119,437 | 3.86  | 4582846.3 | 13,630 | 9.47  |
| Brand B Snus Mint |        |        |           |         |       |           |        |       |
| DC3               | DC3_12 | CTP42  | 4573036.3 | 22,727  | 9.25  | 4582863.3 | 23,238 | 9.60  |
| Brand G Chewing   |        |        |           |         |       |           |        |       |
| Tobacco AR1       | AR1_13 | NCTR13 | 4573049.3 | 42,733  | 7.68  | 4582876.3 | 13,269 | 18.73 |
| Brand G Chewing   |        |        |           |         |       |           |        |       |
| Tobacco AR2       | AR2_13 | NCTR29 | 4573065.3 | 3,801   | 8.35  | 4582892.3 | 19,775 | 10.31 |
| Brand G Chewing   |        |        |           |         |       |           |        |       |
| Tobacco AR3       | AR3_13 | NCTR45 | 4573083.3 | 22,288  | 11.29 | 4582909.3 | 12,246 | 10.59 |
| Brand G Chewing   |        |        |           |         |       |           |        |       |
| Tobacco DC1       | DC1_13 | CTP8   | 4573043.3 | 18,130  | 10.23 | 4582870.3 | 9,959  | 15.61 |
| Brand G Chewing   |        |        |           |         |       |           |        |       |
| Tobacco DC2       | DC2_13 | CTP23  | 4573015.3 | 8,179   | 11.74 | 4582842.3 | 23,284 | 6.57  |
| Brand G Chewing   |        |        |           |         |       |           |        |       |
| Tobacco DC3       | DC3_13 | CTP43  | 4573037.3 | 913     | 4.75  | 4582864.3 | 12,659 | 7.91  |
| Brand H Chewing   |        |        |           |         |       |           |        |       |
| Tobacco AR1       | AR1_14 | NCTR14 | 4573050.3 | 13,388  | 7.61  | 4582877.3 | 11,227 | 15.81 |
| Brand H Chewing   |        |        |           |         |       |           |        |       |
| Tobacco AR2       | AR2_14 | NCTR30 | 4573067.3 | 2,043   | 11.93 | 4582894.3 | 17,036 | 8.20  |
| Brand H Chewing   |        |        |           |         |       |           |        |       |
| Tobacco AR3       | AR3_14 | NCTR46 | 4573084.3 | 29,054  | 5.61  | 4582910.3 | 13,063 | 9.09  |
| Brand H Chewing   |        |        |           |         |       |           |        |       |
| Tobacco DC1       | DC1_14 | CTP13  | 4573004.3 | 9,669   | 3.61  | 4582831.3 | 26,104 | 7.34  |
| Brand H Chewing   |        |        |           |         |       |           |        |       |
| Tobacco DC2       | DC2_14 | CTP28  | 4573020.3 | 815     | 1.89  | 4582847.3 | 19,415 | 8.32  |
| Brand H Chewing   |        |        |           |         |       |           |        |       |
| Tobacco DC3       | DC3_14 | CTP44  | 4573038.3 | 18,450  | 8.71  | 4582865.3 | 19,414 | 11.29 |
| Brand G Golden    |        |        |           |         |       |           |        |       |
| Blend Chewing     | AR1_15 | NCTR16 | 4573051.3 | 52,779  | 6.74  | 4582878.3 | 12,894 | 13.26 |

|                                                |        |        |           |        |       |           |        |       |
|------------------------------------------------|--------|--------|-----------|--------|-------|-----------|--------|-------|
| Tobacco AR1<br>Brand G Golden<br>Blend Chewing |        |        |           |        |       |           |        | 11.04 |
| Tobacco AR2<br>Brand G Golden<br>Blend Chewing | AR2_15 | NCTR31 | 4573068.3 | 33,419 | 7.93  | 4582895.3 | 36,023 |       |
| Tobacco AR3<br>Brand G Golden<br>Blend Chewing | AR3_15 | NCTR5  | 4573085.3 | 10,897 | 4.01  | 4582912.3 | 6,062  | 12.36 |
| Tobacco DC1<br>Brand G Golden<br>Blend Chewing | DC1_15 | CTP14  | 4573005.3 | 13,742 | 3.69  | 4582832.3 | 30,097 | 21.27 |
| Tobacco DC2<br>Brand G Golden<br>Blend Chewing | DC2_15 | CTP29  | 4573021.3 | 15,259 | 11.09 | 4582848.3 | 15,755 | 9.85  |
| Tobacco DC3<br>Brand G Golden<br>Blend Chewing | DC3_15 | CTP45  | 4573039.3 | 21,852 | 19.07 | 4582866.3 | 12,555 | 11.07 |

**Table S3:** Results of the DGGE analysis of microbial population changes

| <u>Product</u>                       | <u>Visual Changes in DGGE Profiles During 15-Day Period?</u> |            |            |            |            |            |
|--------------------------------------|--------------------------------------------------------------|------------|------------|------------|------------|------------|
|                                      | <b>AR1</b>                                                   | <b>DC1</b> | <b>AR2</b> | <b>DC2</b> | <b>AR3</b> | <b>DC3</b> |
| Brand A Straight                     | Yes                                                          | No         | No         | No         | No         | No         |
| Brand A Wintergreen                  | Yes                                                          | No         | No         | No         | Yes        | No         |
| Brand B Straight                     | No                                                           | No         | No         | No         | Yes        | No         |
| Brand B Wintergreen                  | No                                                           | No         | No         | No         | Yes        | No         |
| Brand C Wintergreen                  | No                                                           | No         | No         | Yes        | No         | No         |
| Brand D Straight                     | No                                                           | No         | No         | No         | Yes        | Yes        |
| Brand B Pouches                      | No                                                           | No         | Yes        | Yes        | Yes        | No         |
| Brand A Pouches                      | Yes                                                          | Yes        | Yes        | No         | Yes        | No         |
| Brand B Mint Pouches                 | Yes                                                          | Yes        | No         | No         | No         | Yes        |
| Brand E Snus Mellow                  | No                                                           | No         | No         | No         | No         | No         |
| Brand F Snus Mint                    | No                                                           | No         | No         | No         | No         | No         |
| Brand B Snus Mint                    | No                                                           | No         | No         | No         | No         | No         |
| Brand G Chewing Tobacco              | Yes                                                          | No         | Yes        | No         | No         | No         |
| Brand H Chewing Tobacco              | Yes                                                          | No         | No         | No         | No         | No         |
| Brand G Golden Blend Chewing Tobacco | Yes                                                          | No         | No         | No         | No         | No         |

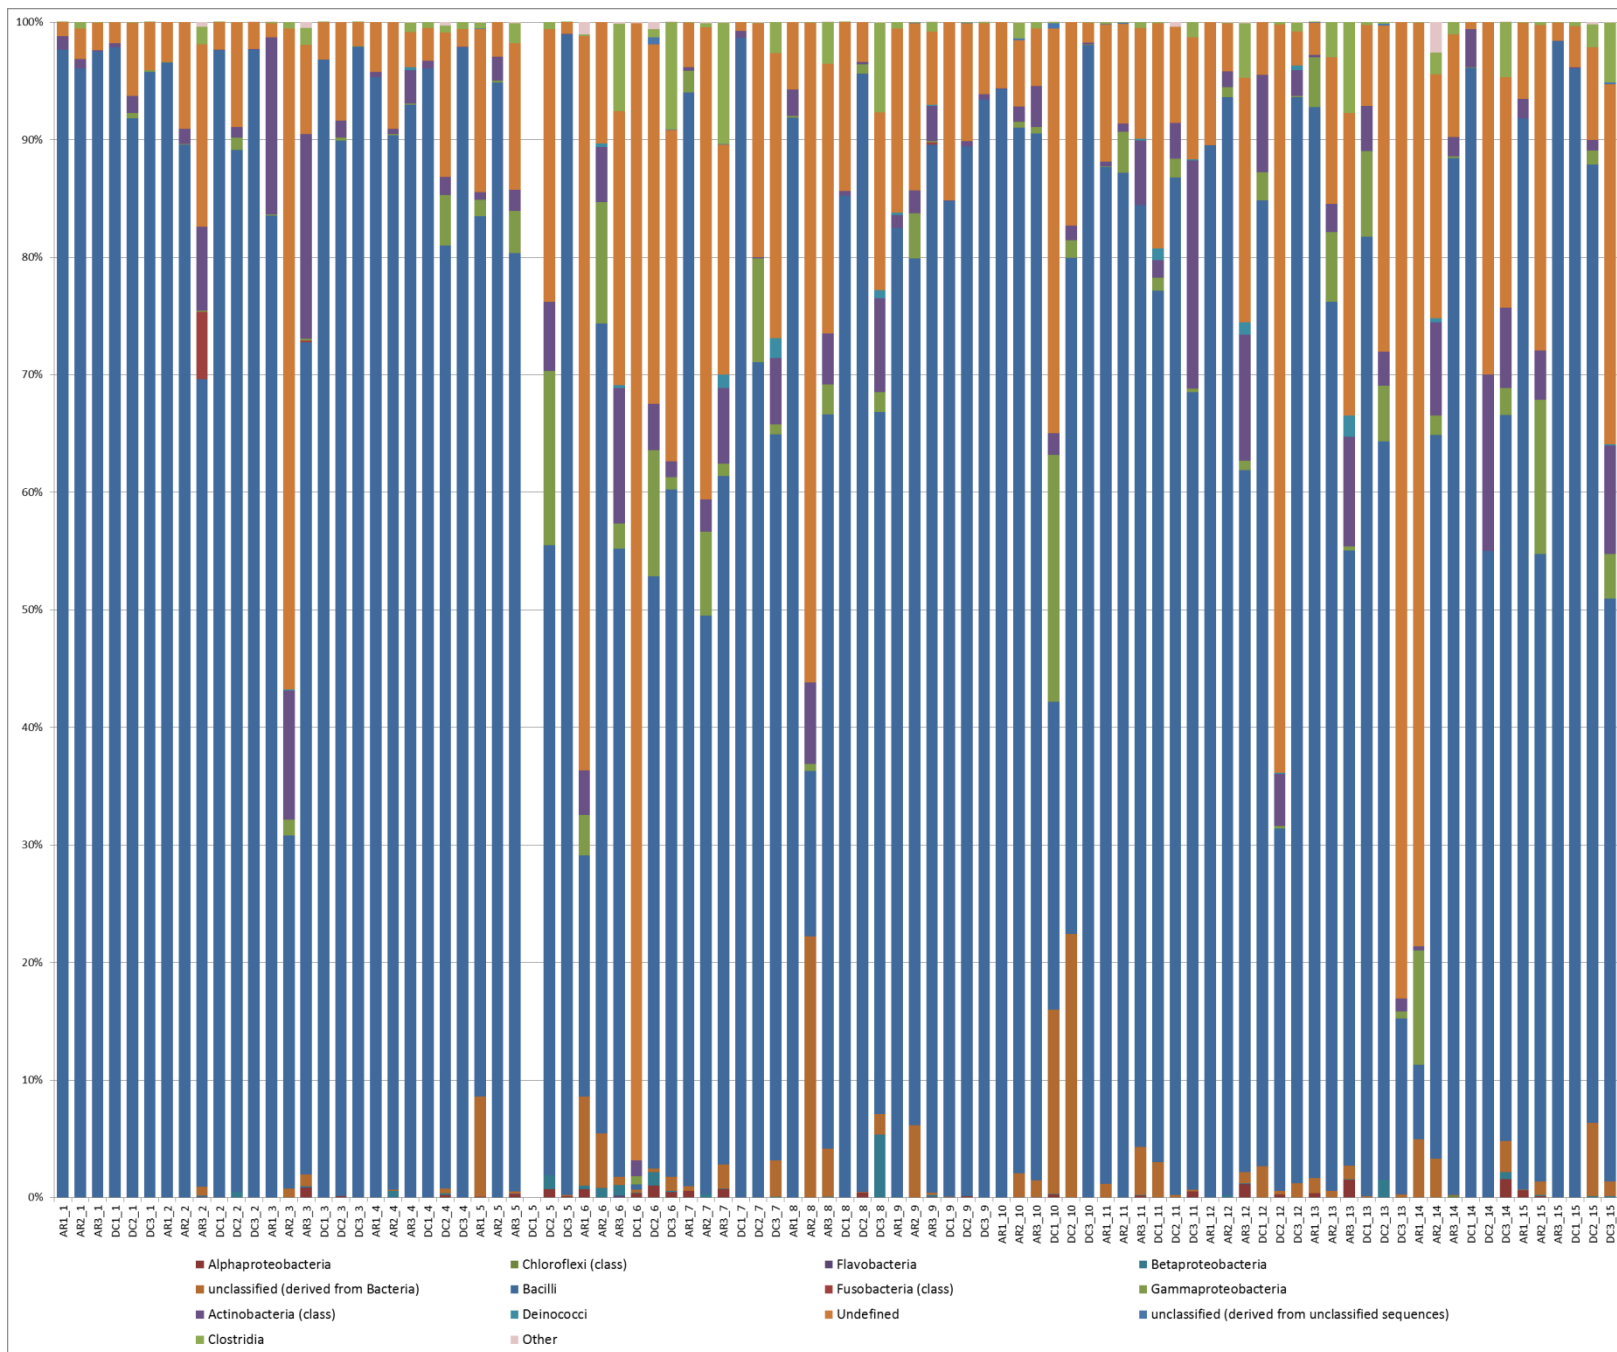

**Figure S1:** Results of pyrosequencing for the V1/V2 region of the 16S rRNA for each of the different types of smokeless tobacco samples analyzed in the study. The sample names are presented on the bottom with the sampling period (AR1, DC1, etc.) and sample type (1, 2,...14, 15), which correspond to the sample type (i.e., 1 = Brand A Straight, etc; See Supplementary Table 3 for a key). The bar graph indicated the percent of sequences detected that belonged to a particular bacterial class. The classes of organisms and color schemes are presented on the bottom of the figure. The DNA sequences identified as plant material have been removed due to their likely non-microbial origins.

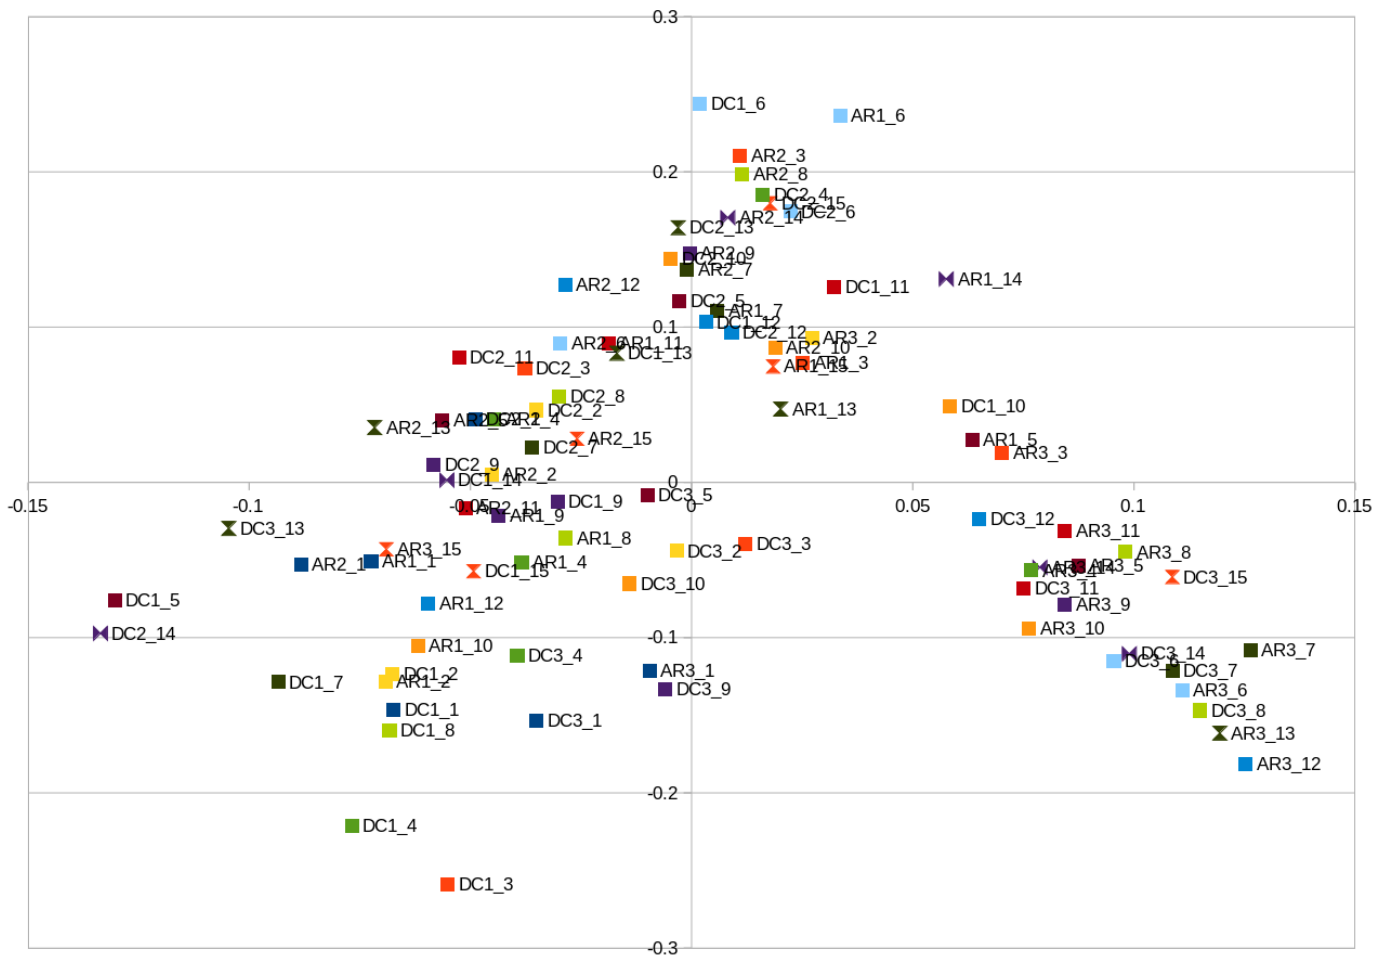

**Figure S2:** PCoA plot generated based on the Class-level analysis of the V2 region of the 16S rRNA for each of the different types of smokeless tobacco samples analyzed in the study. The sample names are presented on the bottom with the sampling period (AR1, DC1, etc.) and sample type (1, 2,...14, 15), which correspond to the sample type (i.e., 1 = Brand A Straight, etc; See Supplementary Table 3 for a key).

Greengenes Class

Greengenes Class

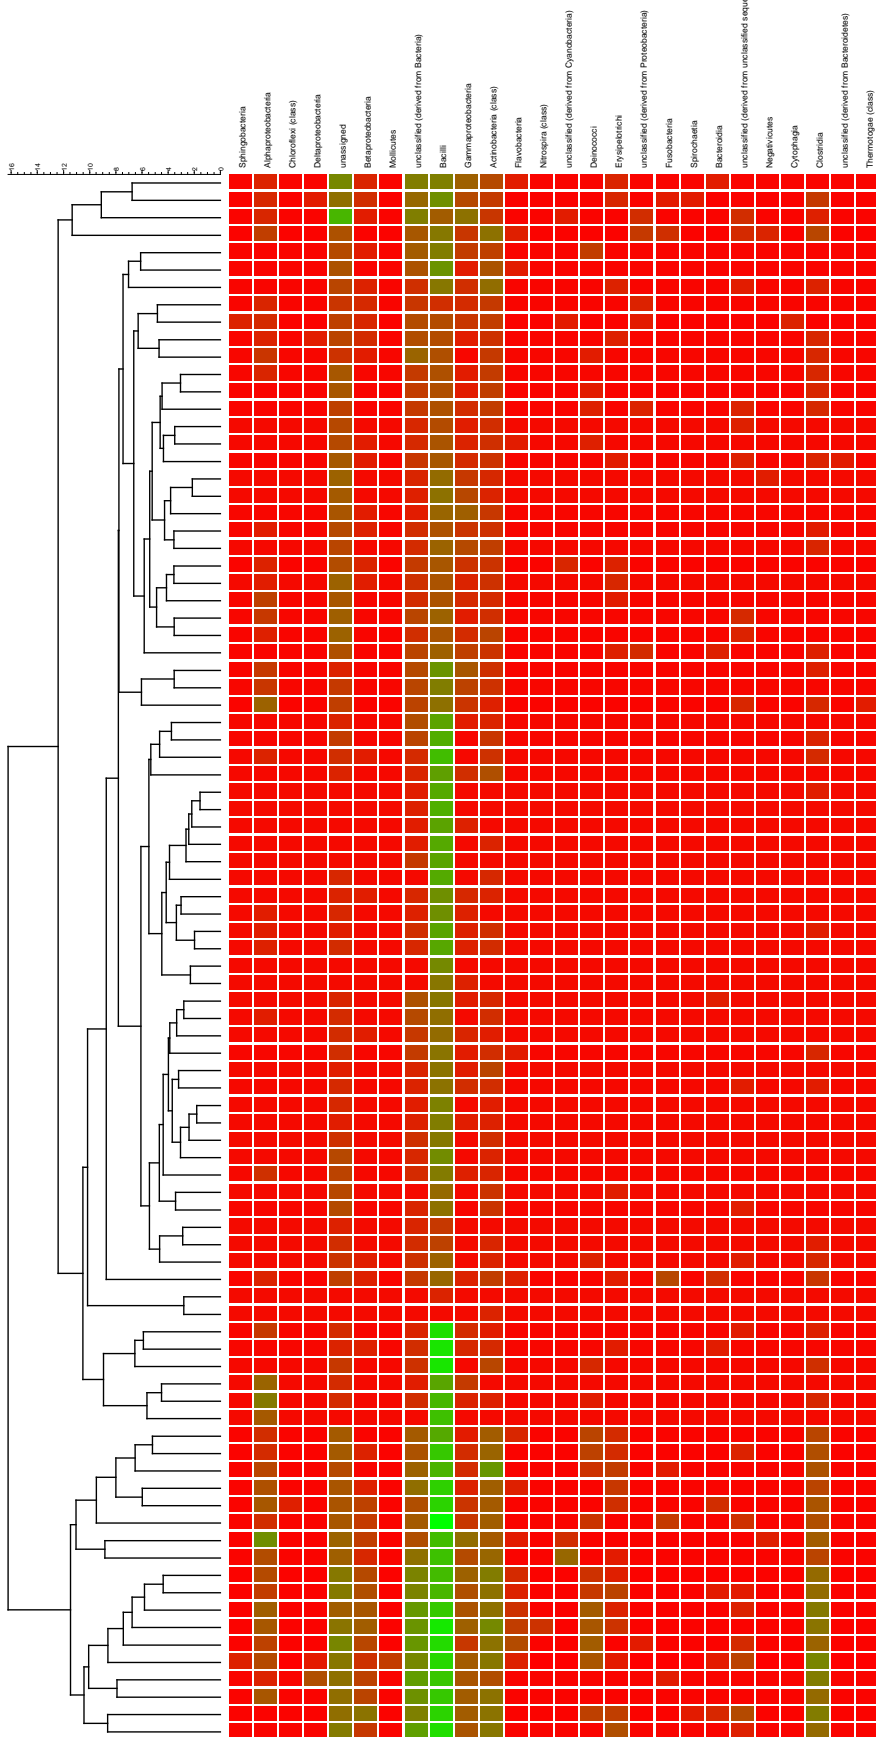

| Sample ID | Product (2)             | MG RAST ID |
|-----------|-------------------------|------------|
| DC1_10    | Snus 1 DC1              | 4573042.3  |
| AR1_6     | Loose Moist Snuff 6 AR1 | 4573086.3  |
| AR1_14    | Chewing Tobacco 2 AR1   | 4573050.3  |
| AR3_3     | Loose Moist Snuff 3 AR3 | 4573071.3  |
| DC1_11    | Snus 2 DC1              | 4573006.3  |
| AR1_15    | Chewing Tobacco 3 AR1   | 4573051.3  |
| AR1_3     | Loose Moist Snuff 3 AR1 | 4573066.3  |
| DC1_6     | Loose Moist Snuff 6 DC1 | 4573040.3  |
| AR1_7     | Moist Snuff Pouch 1 AR1 | 4573087.3  |
| DC2_6     | Loose Moist Snuff 6 DC2 | 4573012.3  |
| DC2_12    | Snus 3 DC2              | 4573019.3  |
| DC2_5     | Loose Moist Snuff 5 DC2 | 4573016.3  |
| AR2_3     | Loose Moist Snuff 3 AR2 | 4573054.3  |
| AR2_14    | Chewing Tobacco 2 AR2   | 4573067.3  |
| DC2_11    | Snus 2 DC2              | 4573023.3  |
| AR2_6     | Loose Moist Snuff 6 AR2 | 4573058.3  |
| AR2_7     | Moist Snuff Pouch 1 AR2 | 4573059.3  |
| DC2_2     | Loose Moist Snuff 2 DC2 | 4573008.3  |
| DC2_7     | Moist Snuff Pouch 1 DC2 | 4573013.3  |
| AR2_9     | Moist Snuff Pouch 3 AR2 | 4573061.3  |
| DC2_13    | Chewing Tobacco 1 DC2   | 4573015.3  |
| DC1_13    | Chewing Tobacco 1 DC1   | 4573043.3  |
| DC2_4     | Loose Moist Snuff 4 DC2 | 4573010.3  |
| AR2_15    | Chewing Tobacco 3 AR2   | 4573068.3  |
| DC2_10    | Snus 1 DC2              | 4573014.3  |
| DC1_12    | Snus 3 DC1              | 4573003.3  |
| AR2_8     | Moist Snuff Pouch 2 AR2 | 4573060.3  |
| DC2_15    | Chewing Tobacco 3 DC2   | 4573021.3  |
| AR1_13    | Chewing Tobacco 1 AR1   | 4573049.3  |
| AR1_8     | Moist Snuff Pouch 2 AR1 | 4573088.3  |
| AR2_10    | Snus 1 AR2              | 4573062.3  |
| DC1_9     | Moist Snuff Pouch 3 DC1 | 4573002.3  |
| DC3_5     | Loose Moist Snuff 5 DC3 | 4573028.3  |
| DC3_10    | Snus 1 DC3              | 4573034.3  |
| AR1_9     | Moist Snuff Pouch 3 AR1 | 4573089.3  |
| DC1_8     | Moist Snuff Pouch 2 DC1 | 4573001.3  |
| DC1_4     | Loose Moist Snuff 4 DC1 | 4573033.3  |
| AR1_2     | Loose Moist Snuff 2 AR1 | 4573055.3  |
| DC1_2     | Loose Moist Snuff 2 DC1 | 4573011.3  |
| DC1_1     | Loose Moist Snuff 1 DC1 | 4573000.3  |
| AR1_10    | Snus 1 AR1              | 4573046.3  |
| DC1_15    | Chewing Tobacco 3 DC1   | 4573005.3  |
| AR1_12    | Snus 3 AR1              | 4573048.3  |
| DC3_4     | Loose Moist Snuff 4 DC3 | 4573027.3  |
| AR1_4     | Loose Moist Snuff 4 AR1 | 4573077.3  |
| DC1_7     | Moist Snuff Pouch 1 DC1 | 4573041.3  |
| AR2_1     | Loose Moist Snuff 1 AR2 | 4573052.3  |
| AR2_2     | Loose Moist Snuff 2 AR2 | 4573053.3  |
| AR2_4     | Loose Moist Snuff 4 AR2 | 4573056.3  |
| DC2_1     | Loose Moist Snuff 1 DC2 | 4573017.3  |
| AR1_11    | Snus 2 AR1              | 4573047.3  |
| DC1_14    | Chewing Tobacco 2 DC1   | 4573004.3  |
| DC2_3     | Loose Moist Snuff 3 DC2 | 4573009.3  |
| AR1_1     | Loose Moist Snuff 1 AR1 | 4573045.3  |
| AR1_5     | Loose Moist Snuff 5 AR1 | 4573085.3  |
| DC2_9     | Moist Snuff Pouch 3 DC2 | 4573018.3  |
| AR2_11    | Snus 2 AR2              | 4573063.3  |
| DC2_8     | Moist Snuff Pouch 2 DC2 | 4573007.3  |
| AR2_5     | Loose Moist Snuff 5 AR2 | 4573057.3  |
| AR2_12    | Snus 3 AR2              | 4573064.3  |
| DC3_13    | Chewing Tobacco 1 DC3   | 4573037.3  |
| AR2_13    | Chewing Tobacco 1 AR2   | 4573065.3  |
| AR3_10    | Snus 1 AR3              | 4574738.3  |
| AR3_2     | Loose Moist Snuff 2 AR3 | 4573070.3  |
| DC2_14    | Chewing Tobacco 2 DC2   | 4573020.3  |
| DC1_5     | Loose Moist Snuff 5 DC1 | 4573044.3  |
| DC3_3     | Loose Moist Snuff 3 DC3 | 4573025.3  |
| DC3_2     | Loose Moist Snuff 2 DC3 | 4573026.3  |
| DC3_9     | Moist Snuff Pouch 3 DC3 | 4573032.3  |
| DC3_1     | Loose Moist Snuff 1 DC3 | 4573024.3  |
| AR3_1     | Loose Moist Snuff 1 AR3 | 4573069.3  |
| DC1_3     | Loose Moist Snuff 3 DC1 | 4573022.3  |
| DC3_12    | Snus 3 DC3              | 4573036.3  |
| AR3_4     | Loose Moist Snuff 4 AR3 | 4573072.3  |
| DC3_11    | Snus 2 DC3              | 4573035.3  |
| AR3_11    | Snus 2 AR3              | 4573080.3  |
| AR3_15    | Chewing Tobacco 3 AR3   | 4573084.3  |
| AR3_9     | Moist Snuff Pouch 3 AR3 | 4573078.3  |
| AR3_5     | Loose Moist Snuff 5 AR3 | 4573073.3  |
| AR3_12    | Snus 3 AR3              | 4573081.3  |
| DC3_15    | Chewing Tobacco 3 DC3   | 4573039.3  |
| AR3_6     | Loose Moist Snuff 6 AR3 | 4573074.3  |
| AR3_14    | Chewing Tobacco 2 AR3   | 4573083.3  |
| AR3_13    | Chewing Tobacco 1 AR3   | 4573082.3  |
| DC3_7     | Moist Snuff Pouch 1 DC3 | 4573031.3  |
| AR3_7     | Moist Snuff Pouch 1 AR3 | 4573075.3  |
| DC3_6     | Loose Moist Snuff 6 DC3 | 4573029.3  |
| DC3_14    | Chewing Tobacco 2 DC3   | 4573038.3  |
| DC3_8     | Moist Snuff Pouch 2 DC3 | 4573030.3  |
| AR3_8     | Moist Snuff Pouch 2 AR3 | 4573076.3  |



**Figure S3:** V1/V2-based Unweighted Pair Group Method with Arithmetic Mean (UPGMA) dendrogram calculated based on the Euclidean distance of the normalized sequence abundance at the Class taxonomic unit. The red to green continuum ranges from 0.00 to 1.00 normalized abundance. The color blocks to the right of the normalized abundance are representative of the 15 different products analyzed during the study.

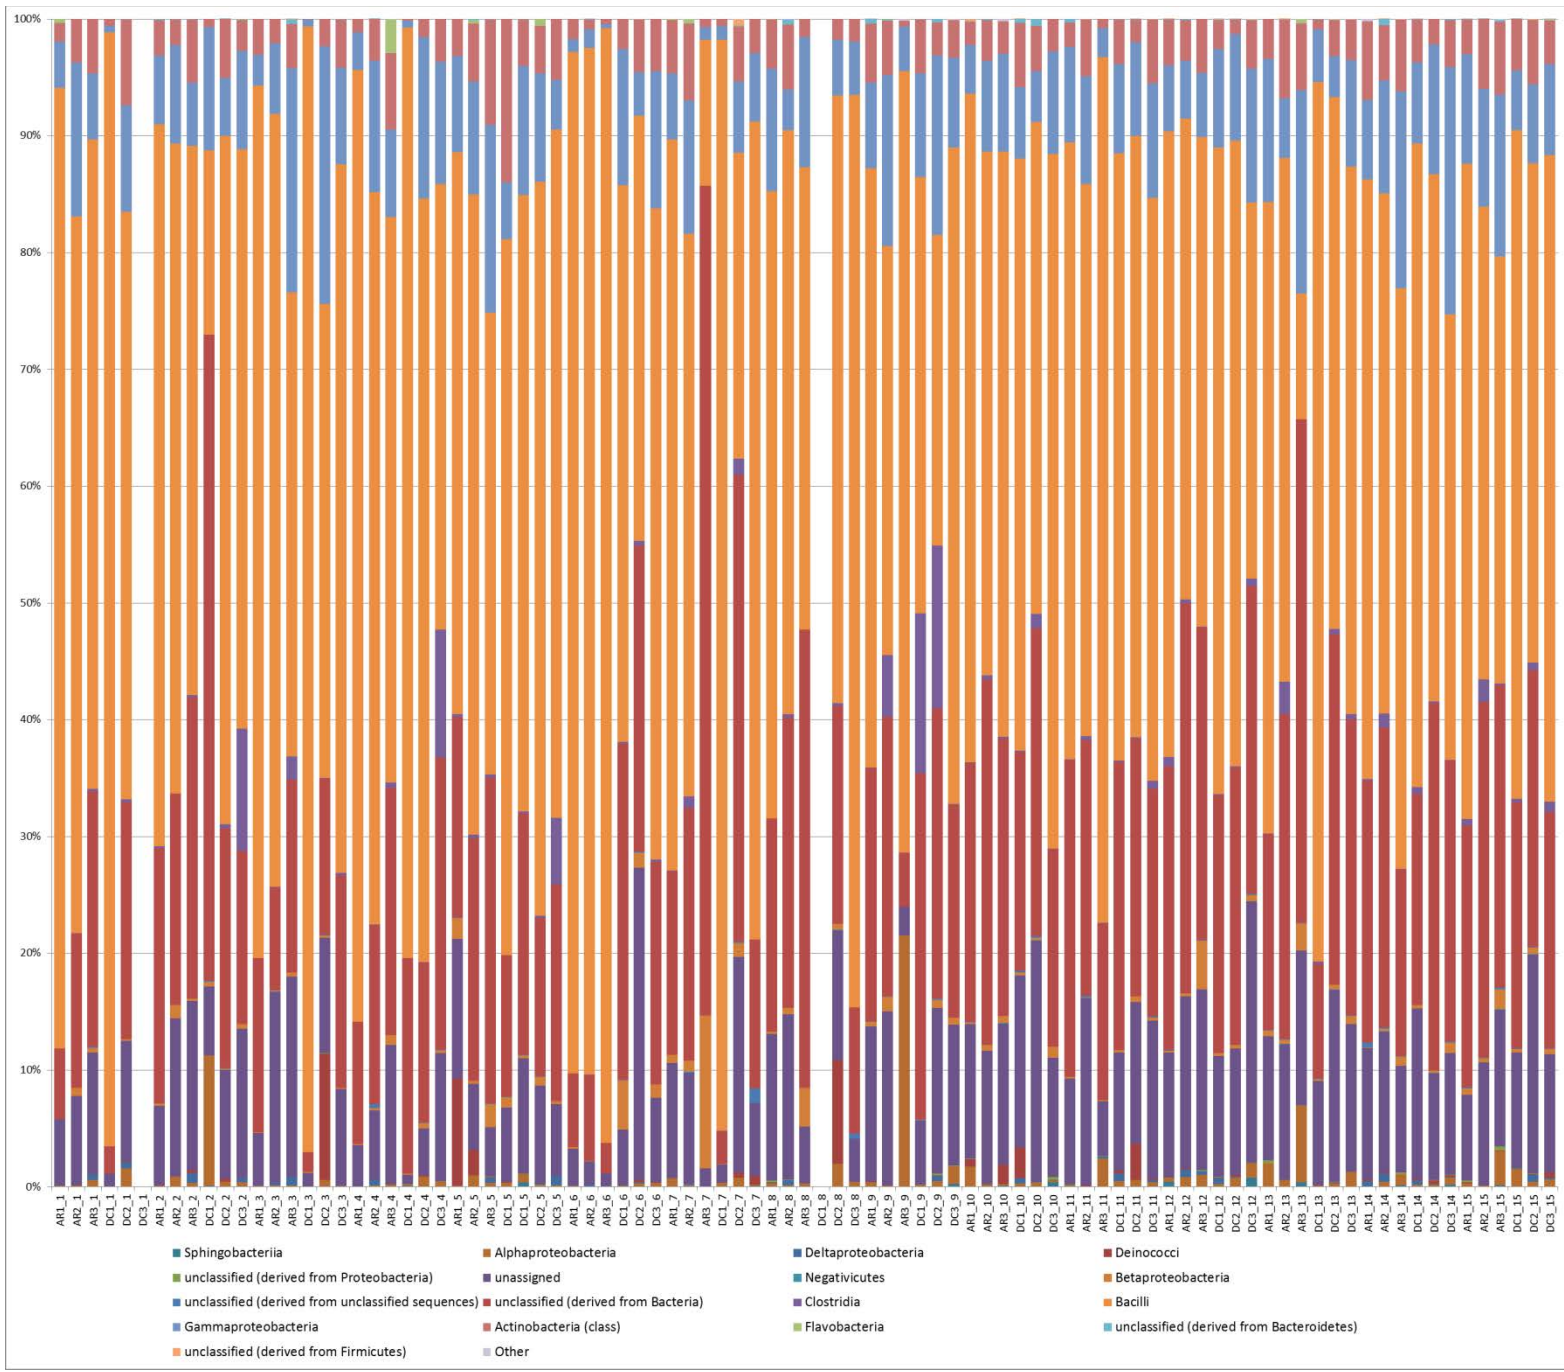

**Figure S4:** Results of pyrosequencing for the V6 region of the 16S rRNA for each of the different types of smokeless tobacco samples analyzed in the study. The sample names are presented on the bottom with the sampling period (AR1, DC1, etc.) and sample type (1, 2,...14, 15), which correspond to the sample type (i.e., 1 = Brand A Straight, etc; See Supplementary Table 3 for a key). The bar graph indicated the percent of sequences detected that belonged to a particular bacterial class. The classes of organisms and color schemes are presented on the bottom of the figure. The DNA sequences identified as plant material have been removed due to their likely non-microbial origins.

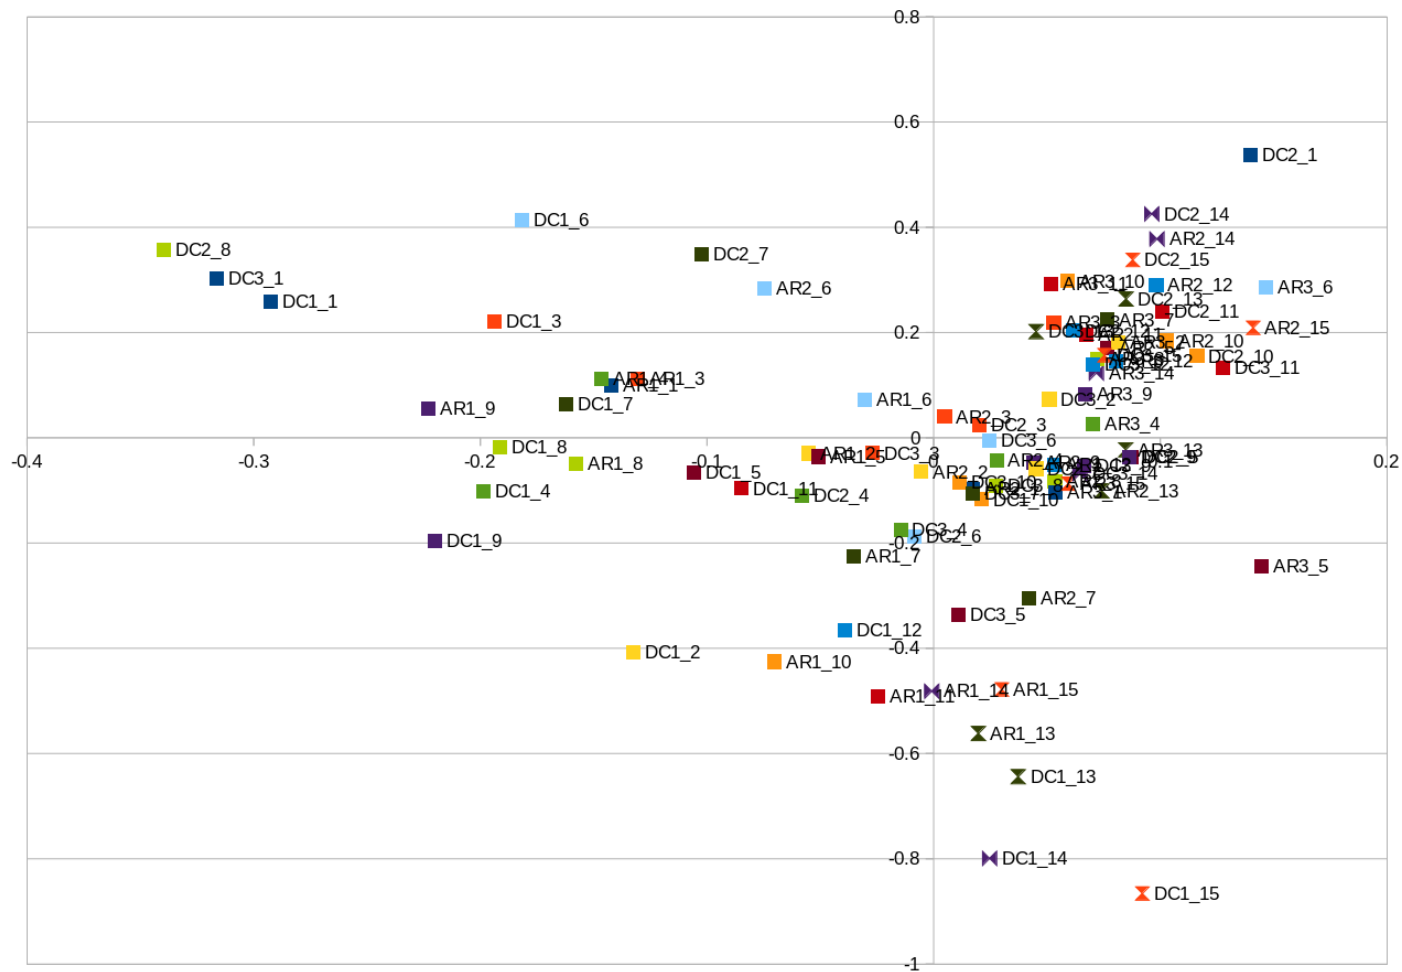

**Figure S5:** PCoA plot generated based on the Class-level analysis of the V6 region of the 16S rRNA for each of the different types of smokeless tobacco samples analyzed in the study. The sample names are presented on the bottom with the sampling period (AR1, DC1, etc.) and sample type (1, 2,...14, 15), which correspond to the sample type (i.e., 1 = Brand A Straight, etc; See Supplementary Table 3 for a key).

Greengenes Class V6

Greengenes Class V6

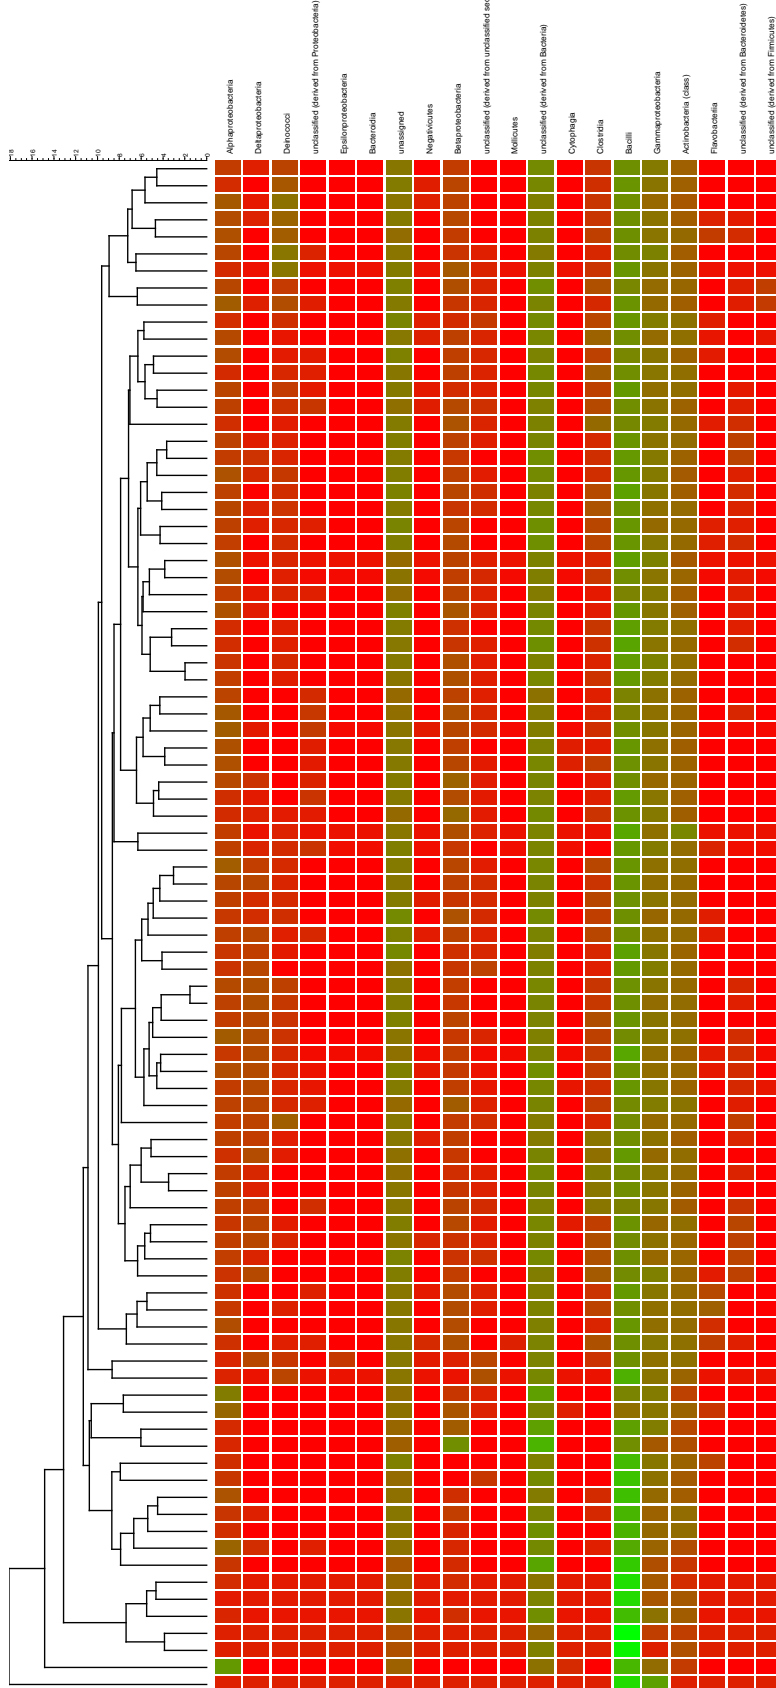

| Sample ID | Product (2)             | MG RAST ID V6 |
|-----------|-------------------------|---------------|
| DC3_14    | Chewing Tobacco 2 DC3   | 4582865.3     |
| DC1_10    | Snus 1 DC1              | 4582869.3     |
| DC3_8     | Moist Snuff Pouch 2 DC3 | 4582857.3     |
| DC3_11    | Snus 2 DC3              | 4582862.3     |
| AR2_5     | Loose Moist Snuff 5 AR2 | 4582884.3     |
| DC2_3     | Loose Moist Snuff 3 DC2 | 4582836.3     |
| AR1_5     | Loose Moist Snuff 5 AR1 | 4582912.3     |
| DC3_7     | Moist Snuff Pouch 1 DC3 | 4582858.3     |
| AR2_10    | Snus 1 AR2              | 4582889.3     |
| AR3_12    | Snus 3 AR3              | 4582907.3     |
| AR3_14    | Chewing Tobacco 2 AR3   | 4582909.3     |
| AR1_13    | Chewing Tobacco 1 AR1   | 4582876.3     |
| AR3_10    | Snus 1 AR3              | 4582911.3     |
| DC2_2     | Loose Moist Snuff 2 DC2 | 4582835.3     |
| AR2_15    | Chewing Tobacco 3 AR2   | 4582895.3     |
| AR3_9     | Moist Snuff Pouch 3 AR3 | 4582905.3     |
| AR2_9     | Moist Snuff Pouch 3 AR2 | 4582888.3     |
| AR2_11    | Snus 2 AR2              | 4582890.3     |
| DC3_12    | Snus 3 DC3              | 4582863.3     |
| DC2_13    | Chewing Tobacco 1 DC2   | 4582842.3     |
| AR2_12    | Snus 3 AR2              | 4582891.3     |
| DC3_13    | Chewing Tobacco 1 DC3   | 4582864.3     |
| AR3_11    | Snus 2 AR3              | 4582906.3     |
| DC2_4     | Loose Moist Snuff 4 DC2 | 4582837.3     |
| DC2_5     | Loose Moist Snuff 5 DC2 | 4582843.3     |
| AR1_15    | Chewing Tobacco 3 AR1   | 4582878.3     |
| AR2_2     | Loose Moist Snuff 2 AR2 | 4582880.3     |
| DC3_3     | Loose Moist Snuff 3 DC3 | 4582852.3     |
| AR1_2     | Loose Moist Snuff 2 AR1 | 4582882.3     |
| AR2_1     | Loose Moist Snuff 1 AR2 | 4582879.3     |
| AR1_7     | Moist Snuff Pouch 1 AR1 | 4582914.3     |
| DC1_14    | Chewing Tobacco 2 DC1   | 4582831.3     |
| DC1_15    | Chewing Tobacco 3 DC1   | 4582832.3     |
| AR2_13    | Chewing Tobacco 1 AR2   | 4582892.3     |
| AR1_10    | Snus 1 AR1              | 4582873.3     |
| AR1_14    | Chewing Tobacco 2 AR1   | 4582877.3     |
| DC1_12    | Snus 3 DC1              | 4582830.3     |
| AR1_11    | Snus 2 AR1              | 4582874.3     |
| DC2_6     | Loose Moist Snuff 6 DC2 | 4582839.3     |
| DC1_5     | Loose Moist Snuff 5 DC1 | 4582871.3     |
| AR2_8     | Moist Snuff Pouch 2 AR2 | 4582887.3     |
| DC2_15    | Chewing Tobacco 3 DC2   | 4582848.3     |
| AR3_1     | Loose Moist Snuff 1 AR3 | 4582896.3     |
| AR1_12    | Snus 3 AR1              | 4582875.3     |
| DC3_6     | Loose Moist Snuff 6 DC3 | 4582856.3     |
| DC3_15    | Chewing Tobacco 3 DC3   | 4582866.3     |
| AR2_3     | Loose Moist Snuff 3 AR2 | 4582881.3     |
| AR2_4     | Loose Moist Snuff 4 AR2 | 4582883.3     |
| DC2_11    | Snus 2 DC2              | 4582850.3     |
| AR3_2     | Loose Moist Snuff 2 AR3 | 4582897.3     |
| DC2_14    | Chewing Tobacco 2 DC2   | 4582847.3     |
| DC2_1     | Loose Moist Snuff 1 DC2 | 4582844.3     |
| AR3_6     | Loose Moist Snuff 6 AR3 | 4582901.3     |
| AR3_13    | Chewing Tobacco 1 AR3   | 4582908.3     |
| DC2_12    | Snus 3 DC2              | 4582846.3     |
| AR3_5     | Loose Moist Snuff 5 AR3 | 4582900.3     |
| DC2_10    | Snus 1 DC2              | 4582841.3     |
| DC3_2     | Loose Moist Snuff 2 DC3 | 4582853.3     |
| AR1_6     | Loose Moist Snuff 6 AR1 | 4582913.3     |
| DC2_9     | Moist Snuff Pouch 3 DC2 | 4582845.3     |
| DC3_4     | Loose Moist Snuff 4 DC3 | 4582854.3     |
| DC3_9     | Moist Snuff Pouch 3 DC3 | 4582859.3     |
| AR3_8     | Moist Snuff Pouch 2 AR3 | 4582903.3     |
| AR3_15    | Chewing Tobacco 3 AR3   | 4582910.3     |
| DC3_10    | Snus 1 DC3              | 4582861.3     |
| AR3_3     | Loose Moist Snuff 3 AR3 | 4582898.3     |
| DC3_5     | Loose Moist Snuff 5 DC3 | 4582855.3     |
| AR3_4     | Loose Moist Snuff 4 AR3 | 4582899.3     |
| AR2_7     | Moist Snuff Pouch 1 AR2 | 4582886.3     |
| AR3_7     | Moist Snuff Pouch 1 AR3 | 4582902.3     |
| AR2_14    | Chewing Tobacco 2 AR2   | 4582894.3     |
| AR1_8     | Moist Snuff Pouch 2 AR1 | 4582915.3     |
| DC1_2     | Loose Moist Snuff 2 DC1 | 4582838.3     |
| DC1_13    | Chewing Tobacco 1 DC1   | 4582870.3     |
| DC1_8     | Moist Snuff Pouch 2 DC1 | 4582828.3     |
| DC1_7     | Moist Snuff Pouch 1 DC1 | 4582868.3     |
| AR1_1     | Loose Moist Snuff 1 AR1 | 4582872.3     |
| AR1_9     | Moist Snuff Pouch 3 AR1 | 4582916.3     |
| DC2_7     | Moist Snuff Pouch 1 DC2 | 4582840.3     |
| AR2_6     | Loose Moist Snuff 6 AR2 | 4582885.3     |
| AR1_3     | Loose Moist Snuff 3 AR1 | 4582893.3     |
| DC1_11    | Snus 2 DC1              | 4582833.3     |
| DC1_4     | Loose Moist Snuff 4 DC1 | 4582860.3     |
| DC1_3     | Loose Moist Snuff 3 DC1 | 4582849.3     |
| DC1_6     | Loose Moist Snuff 6 DC1 | 4582867.3     |
| AR1_4     | Loose Moist Snuff 4 AR1 | 4582904.3     |
| DC1_1     | Loose Moist Snuff 1 DC1 | 4582827.3     |
| DC3_1     | Loose Moist Snuff 1 DC3 | 4582851.3     |
| DC1_9     | Moist Snuff Pouch 3 DC1 | 4582829.3     |
| DC2_8     | Moist Snuff Pouch 2 DC2 | 4582834.3     |

**Figure S6:** V6-based Unweighted Pair Group Method with Arithmetic Mean (UPGMA) dendrogram calculated based on the Euclidean distance of the normalized sequence abundance at the Class taxonomic unit. The red to green continuum ranges from 0.00 to 1.00 normalized abundance. The color blocks to the right of the normalized abundance are representative of the 15 different products analyzed during the study.

**Figure S7 (below):** Denaturing Gradient Gel Electrophoresis (DGGE) gels used to analyze the 16S rRNA gene profiles of total bacteria isolated from open STP samples during a 15-day sampling period. Changes in the DGGE profiles would be indicative of changes in the bacterial populations over the 15-day period. The 26 gels below contain the data from each of the samples at day 1 (D1; when the product was opened initially) and subsequently days 3 (D3), 5 (D5), 8 (D8) and 15 (D15). DNA samples isolated each day from a particular product are shown adjacent to one another to evaluate profile changes over the sampling period. Products/samples identified in blue labels did not appear to have any profile changes, those in red likely had changes in the banding profiles over the study period and those in grey were repeated on another gel due to poor initial banding resolution. The sample IDs are defined in Supplementary Table S3 and an overview of the DGGE results is shown in Supplemental Table S4.

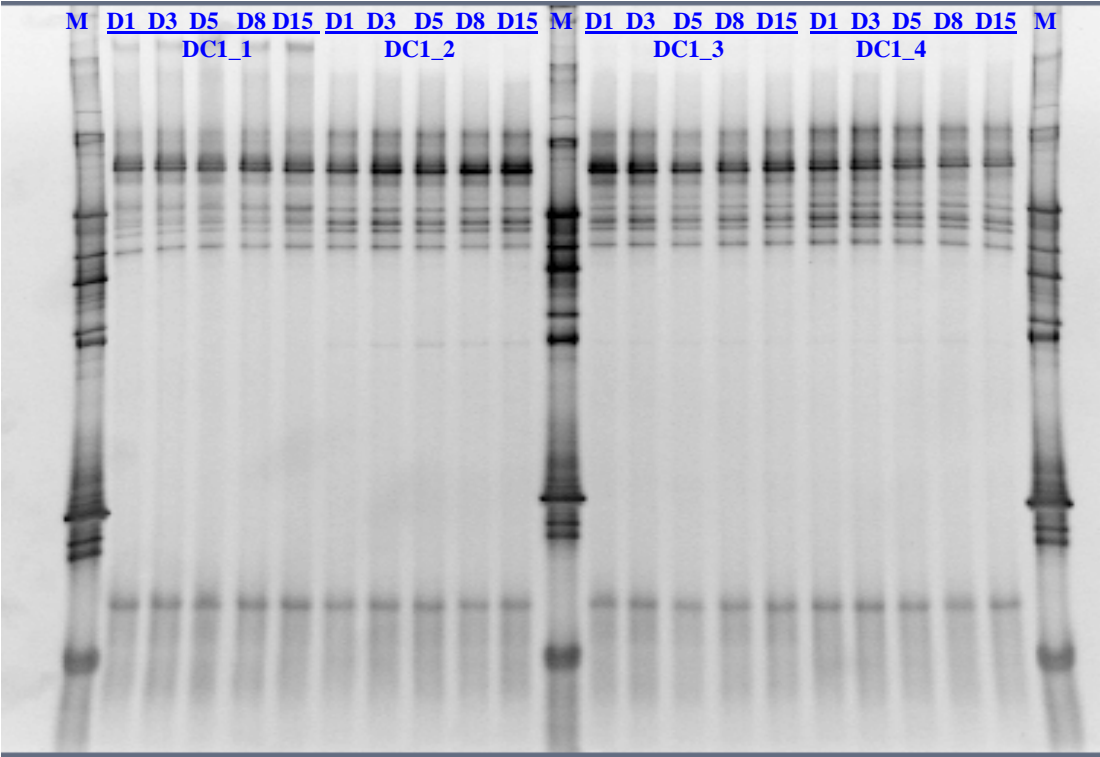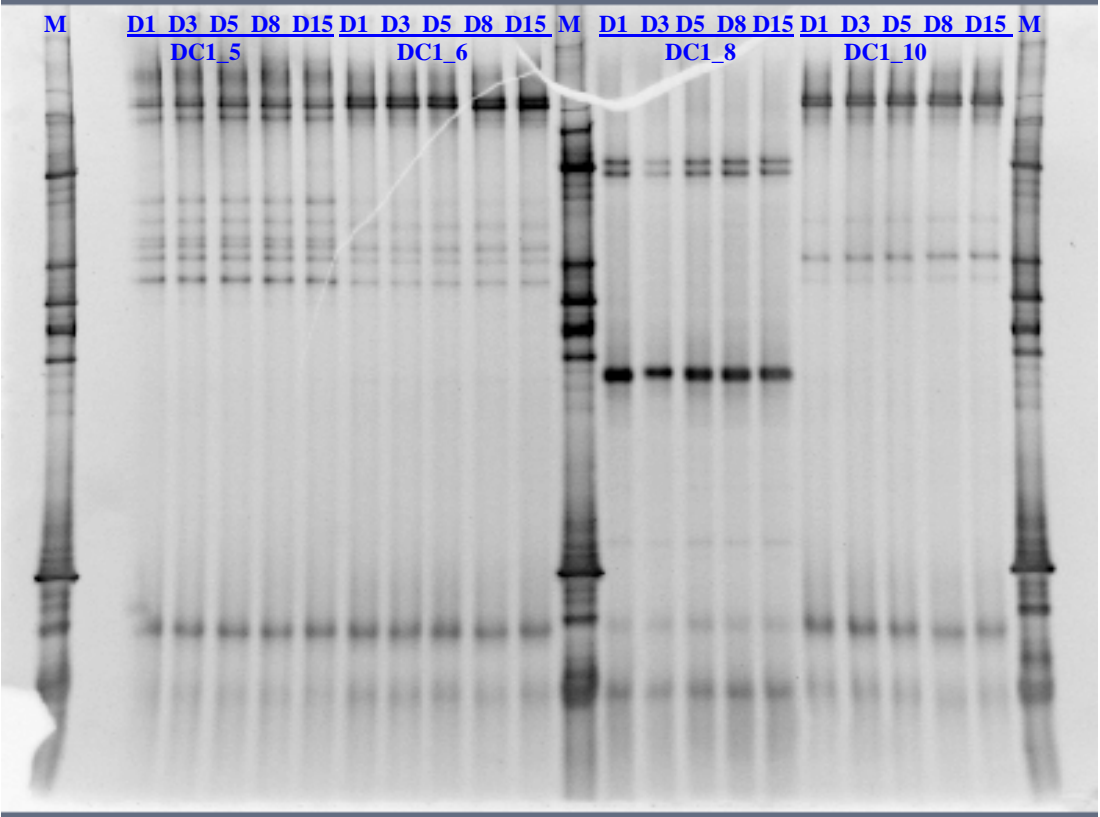

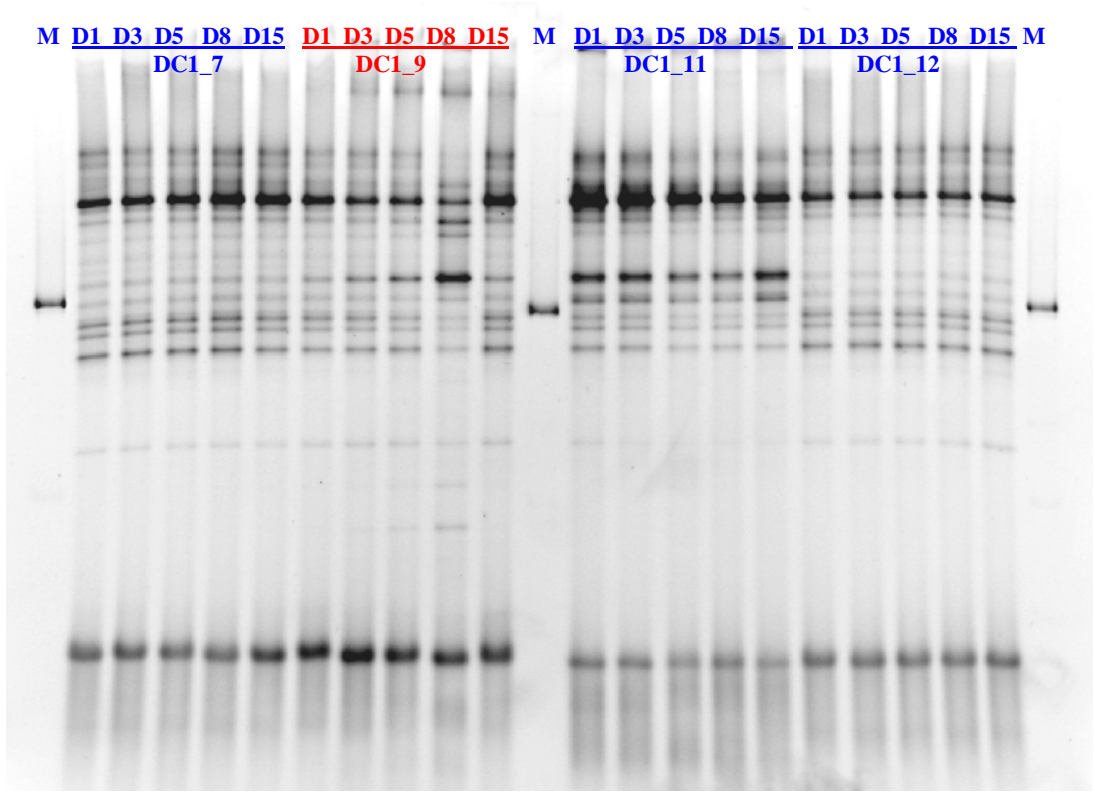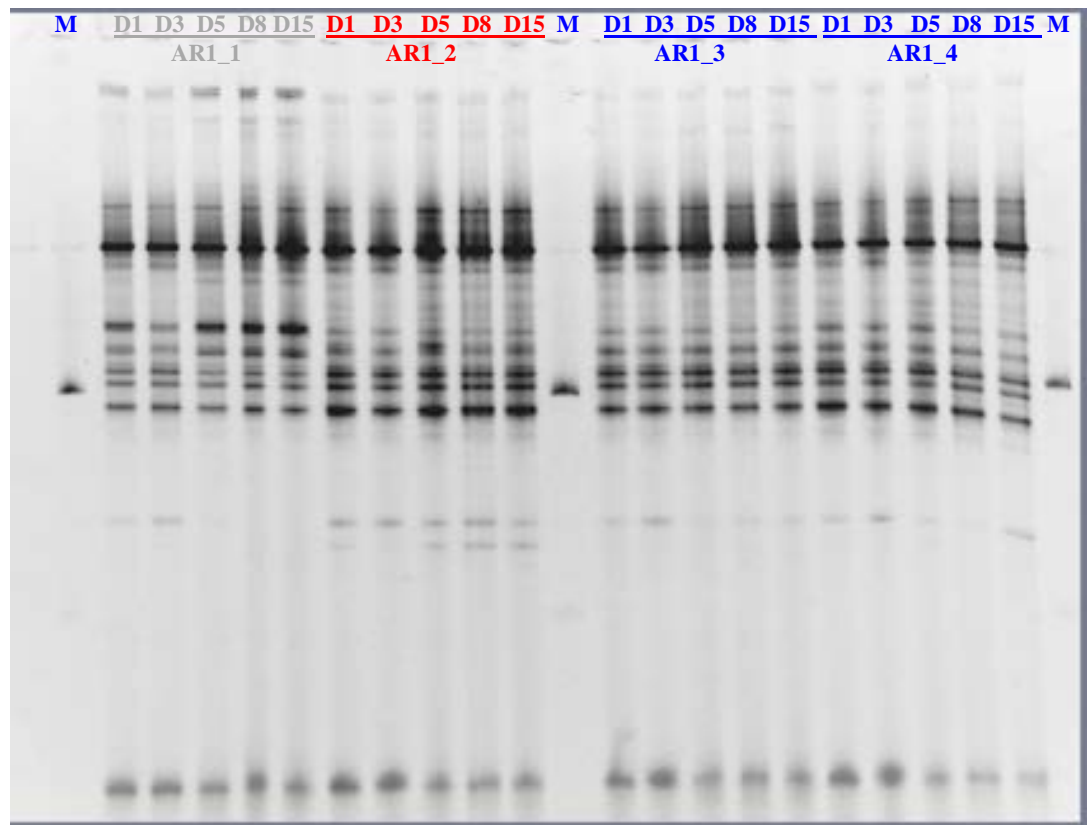



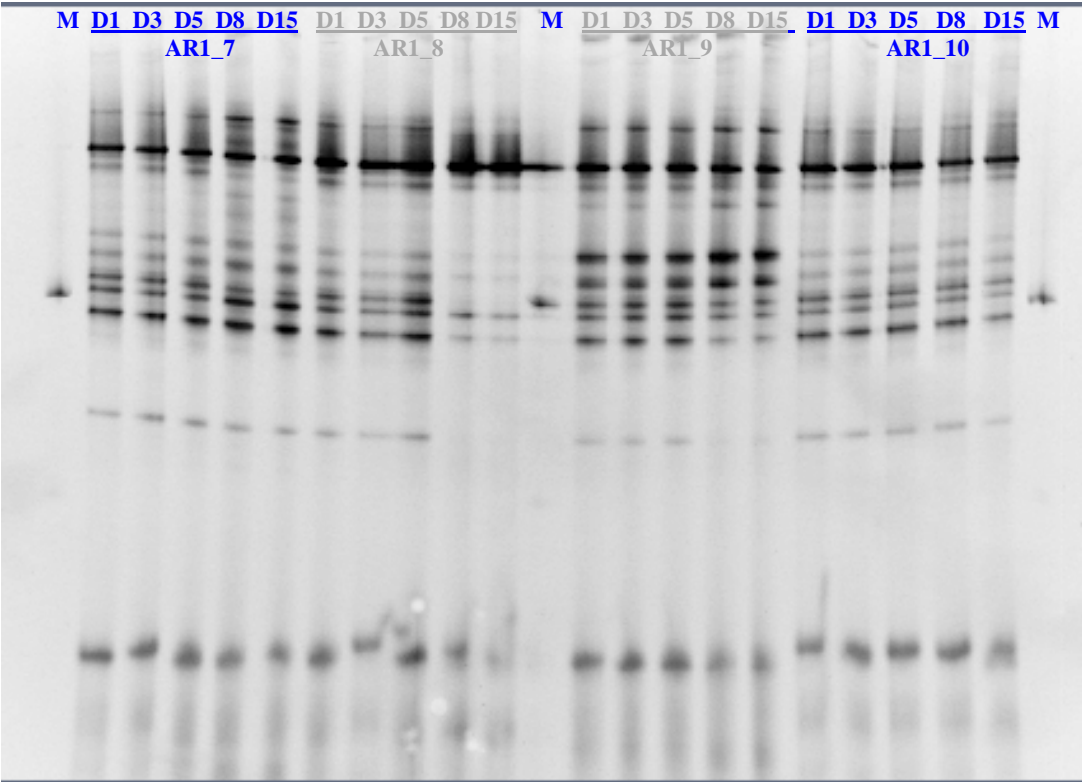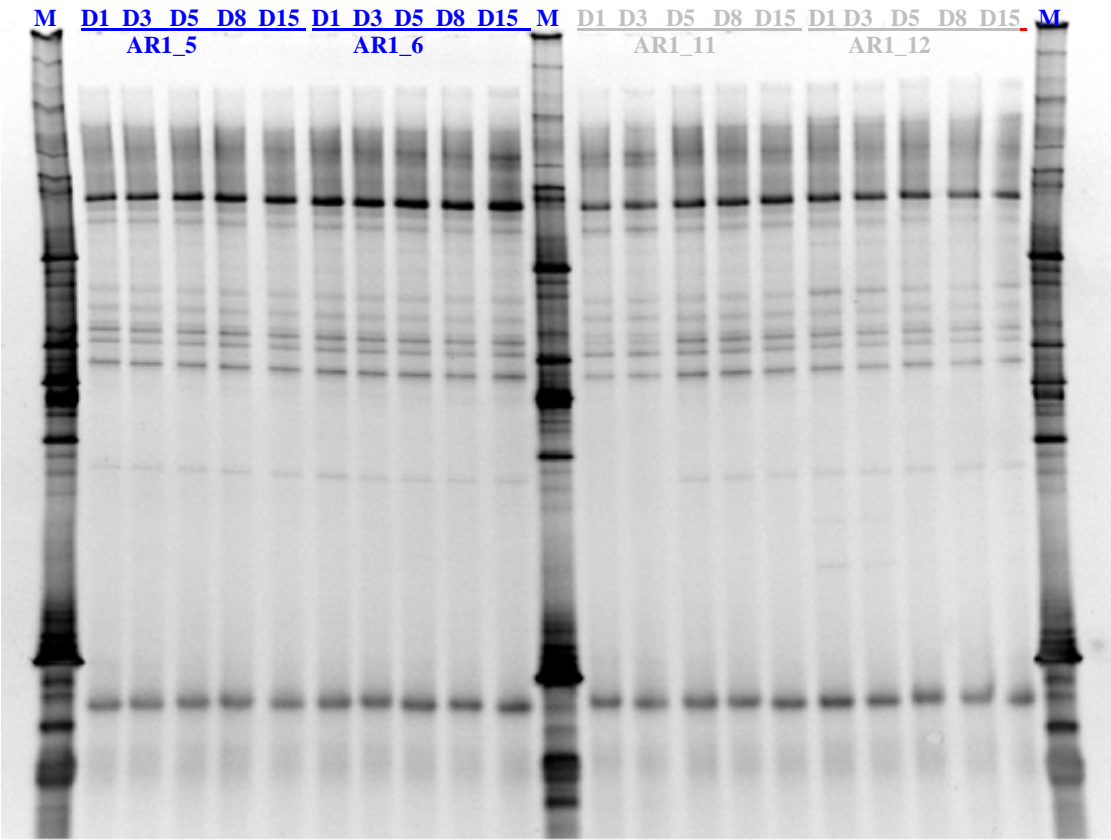

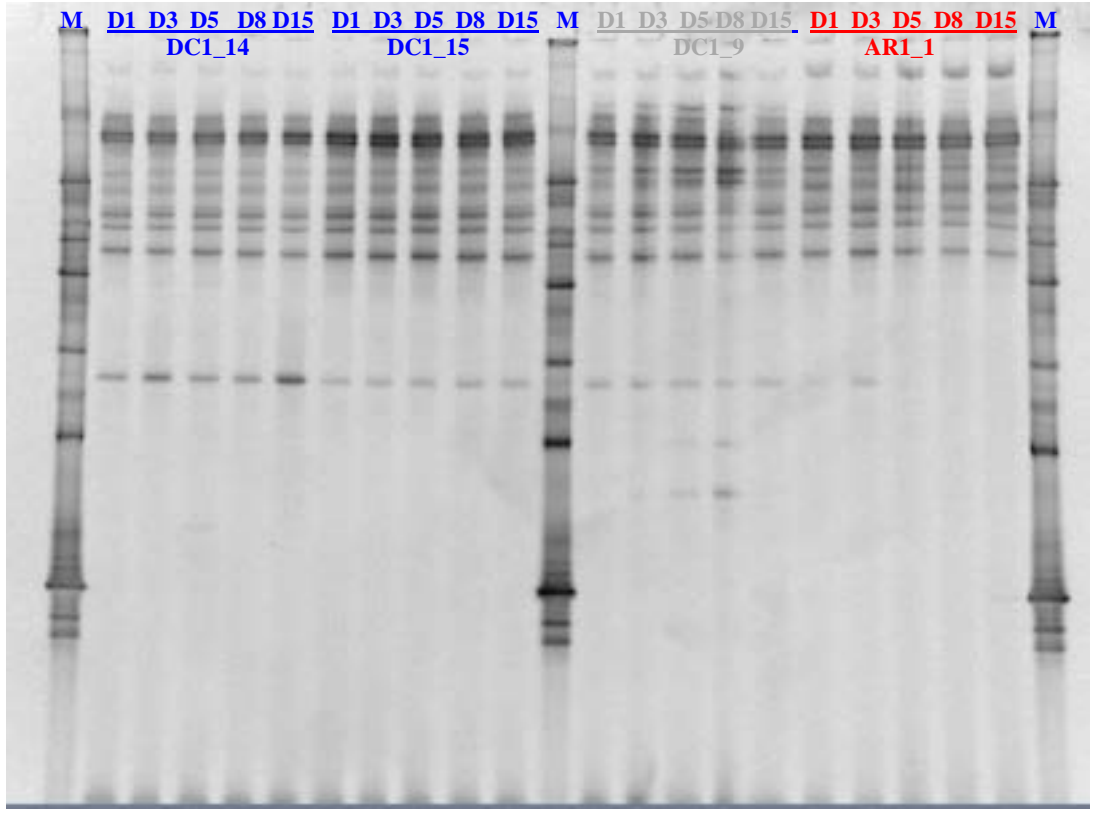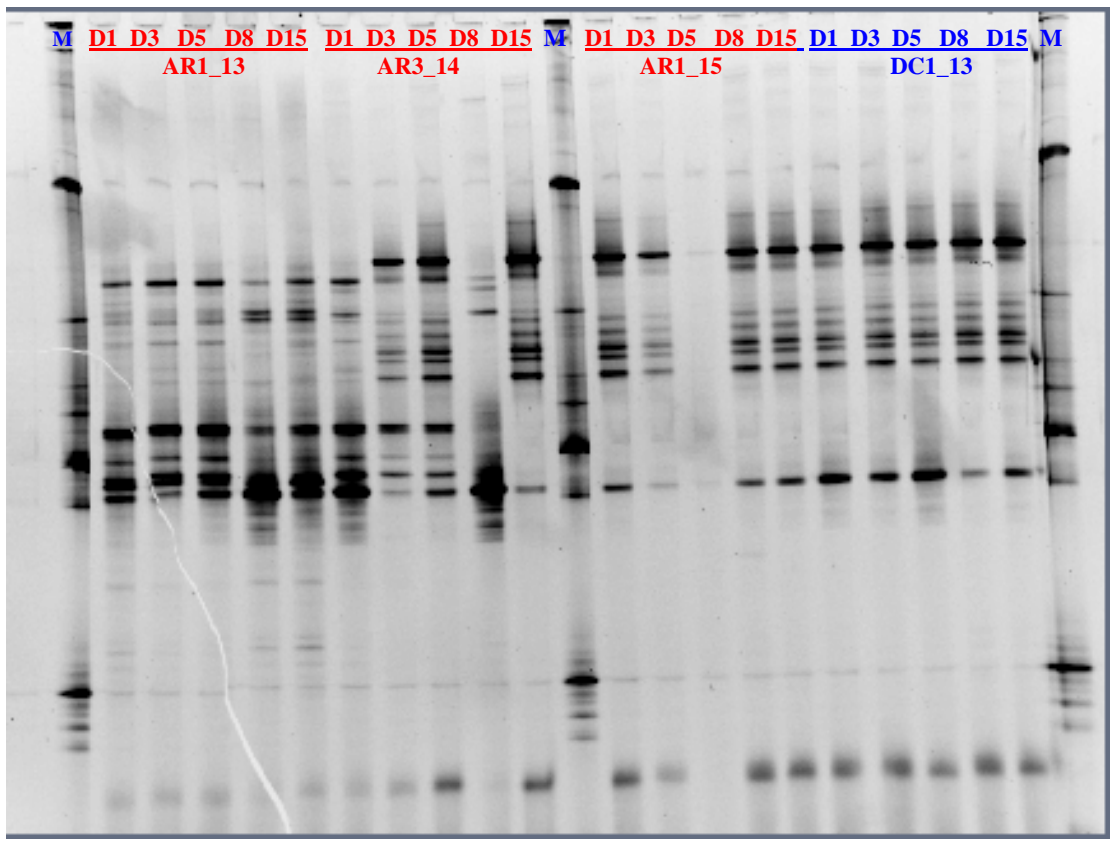

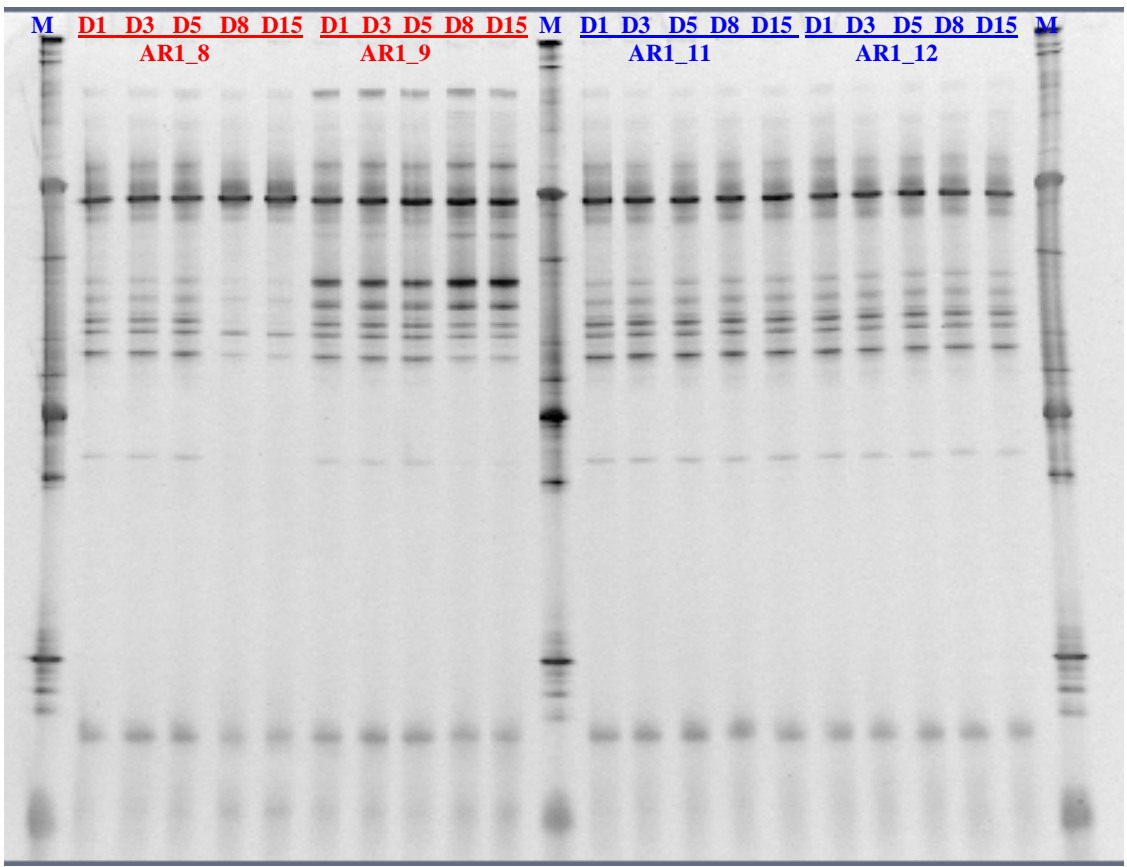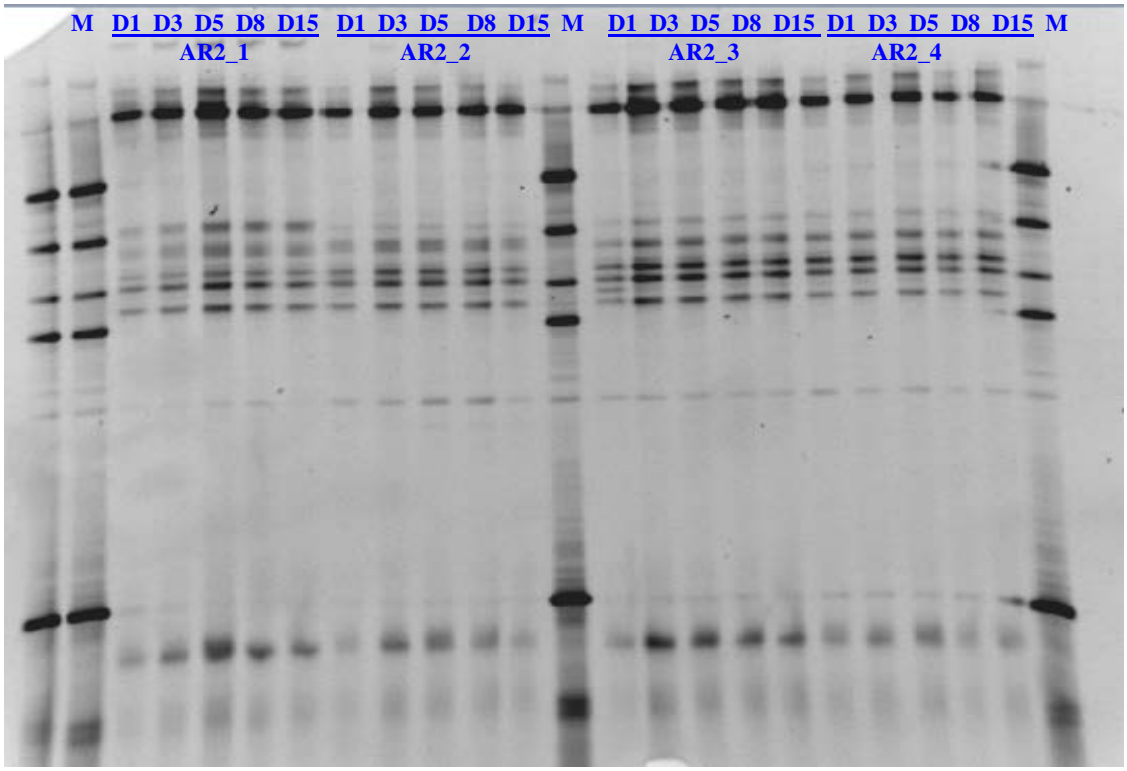

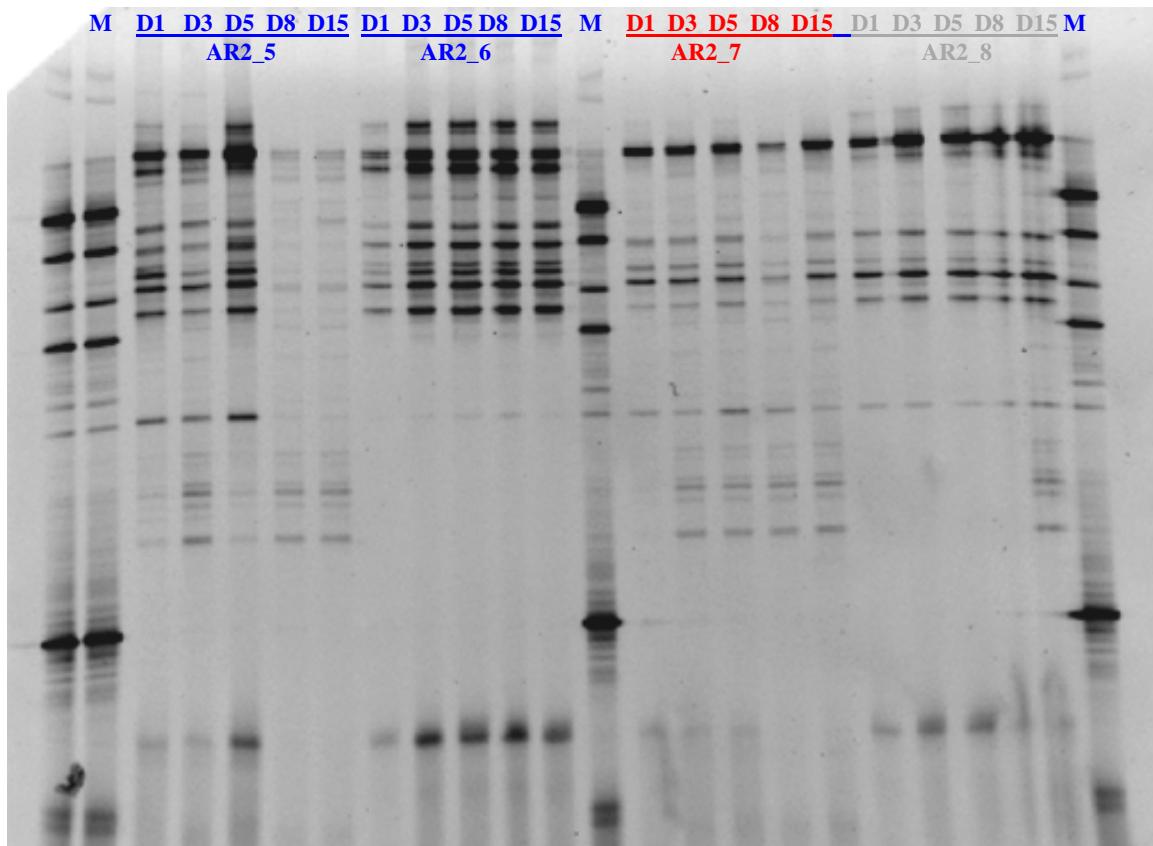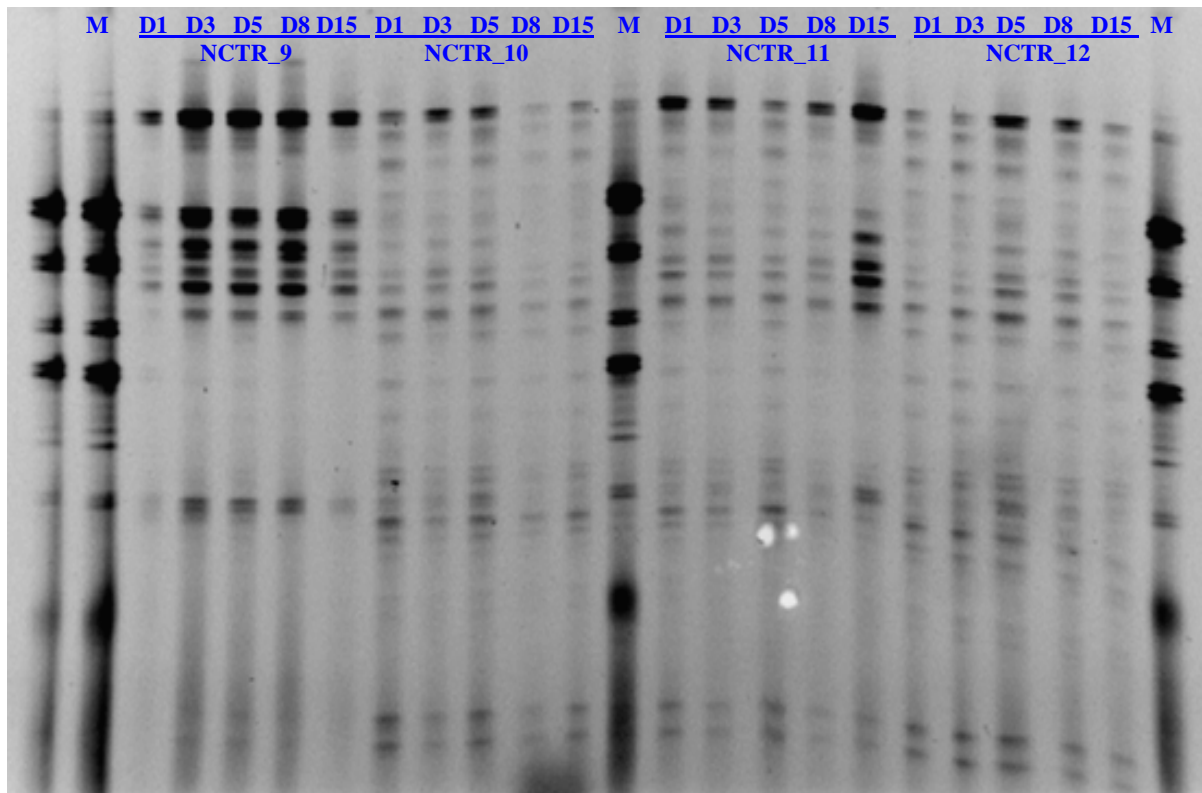

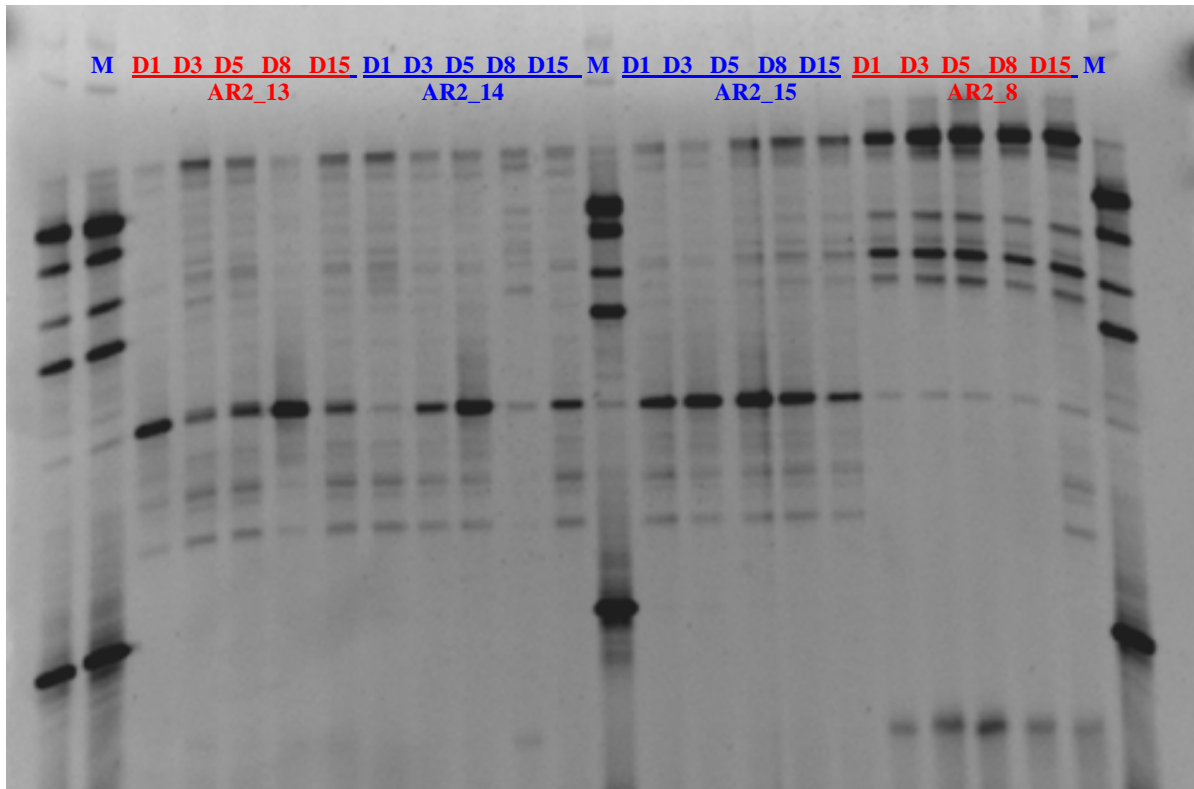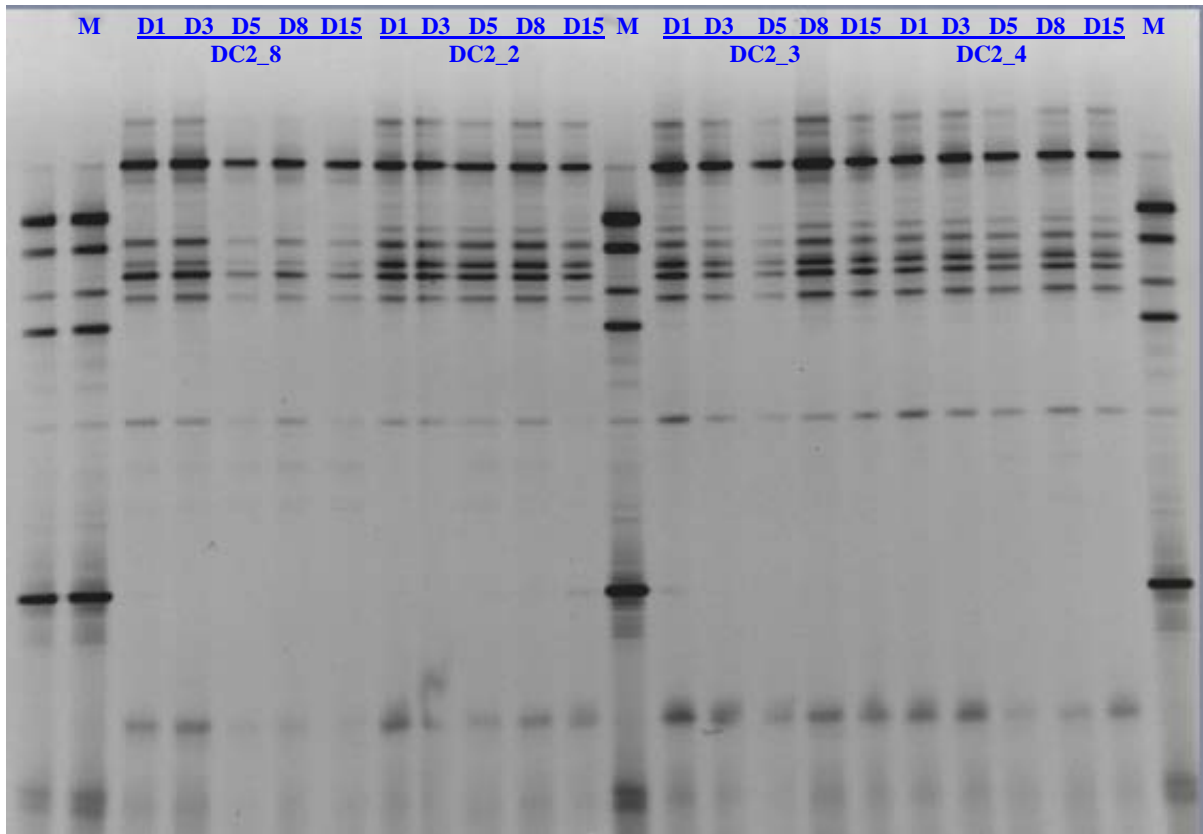

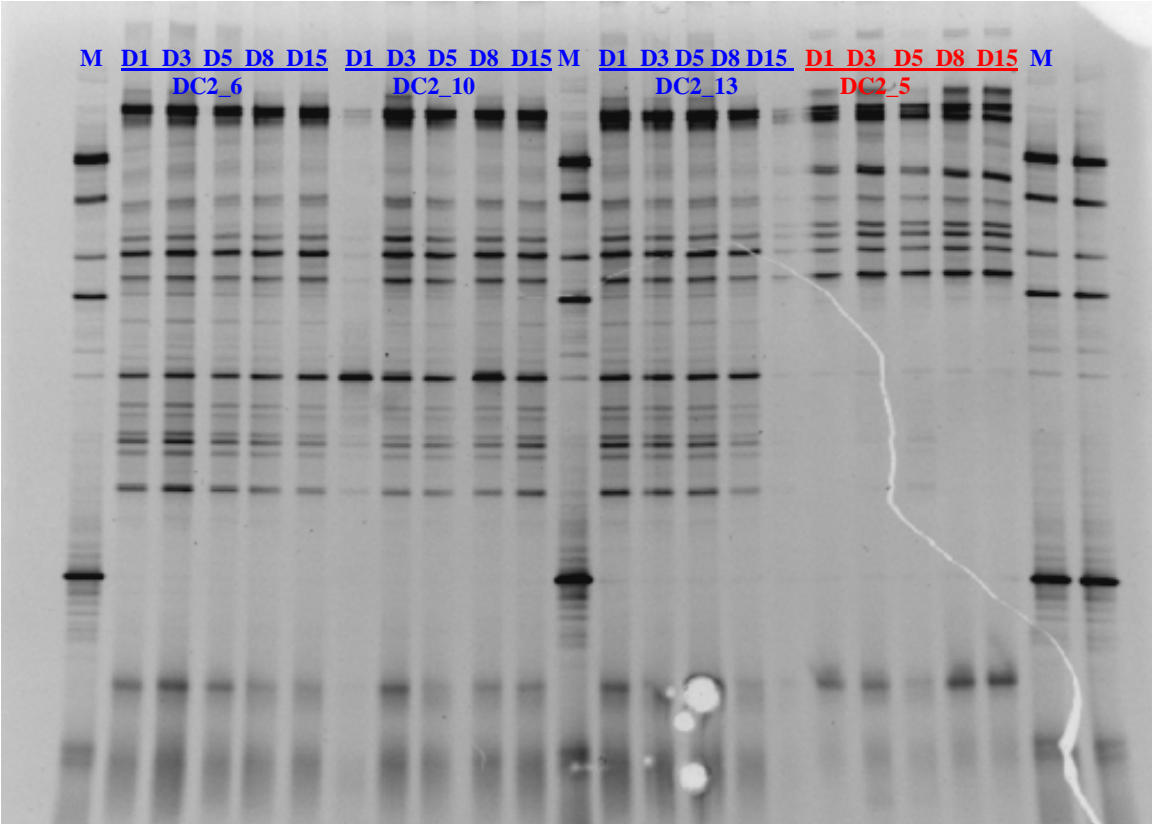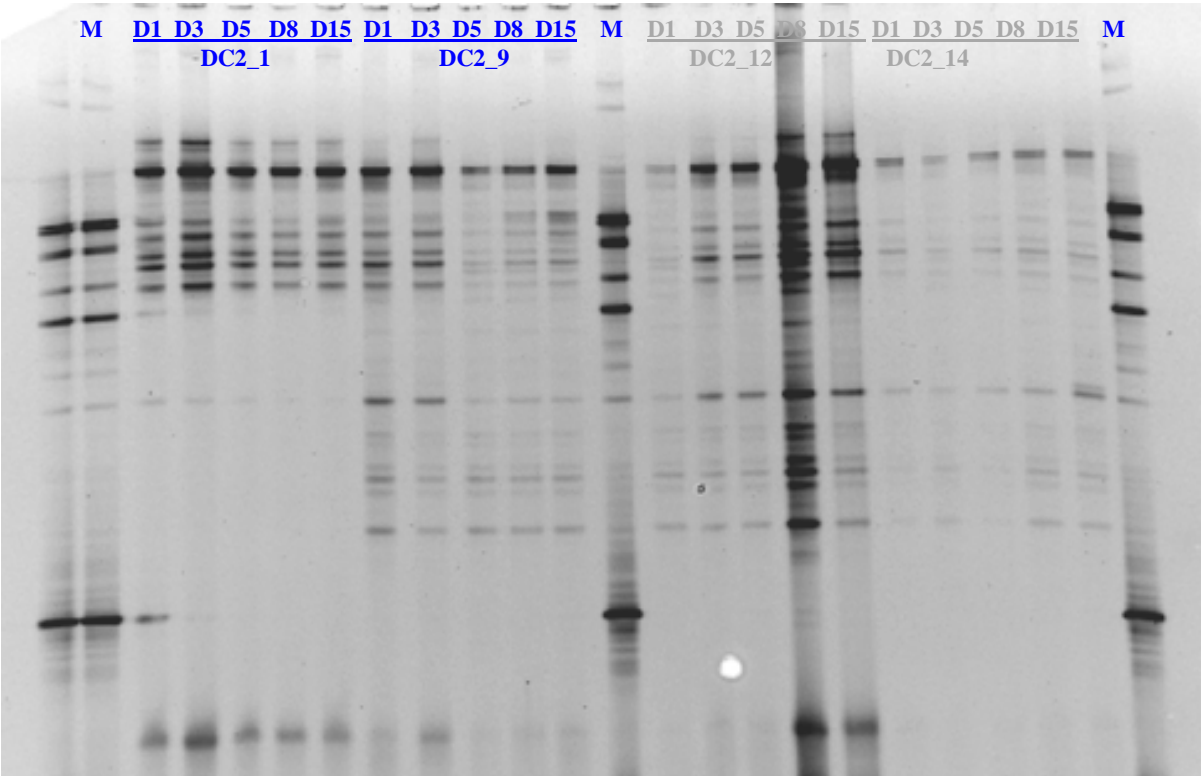

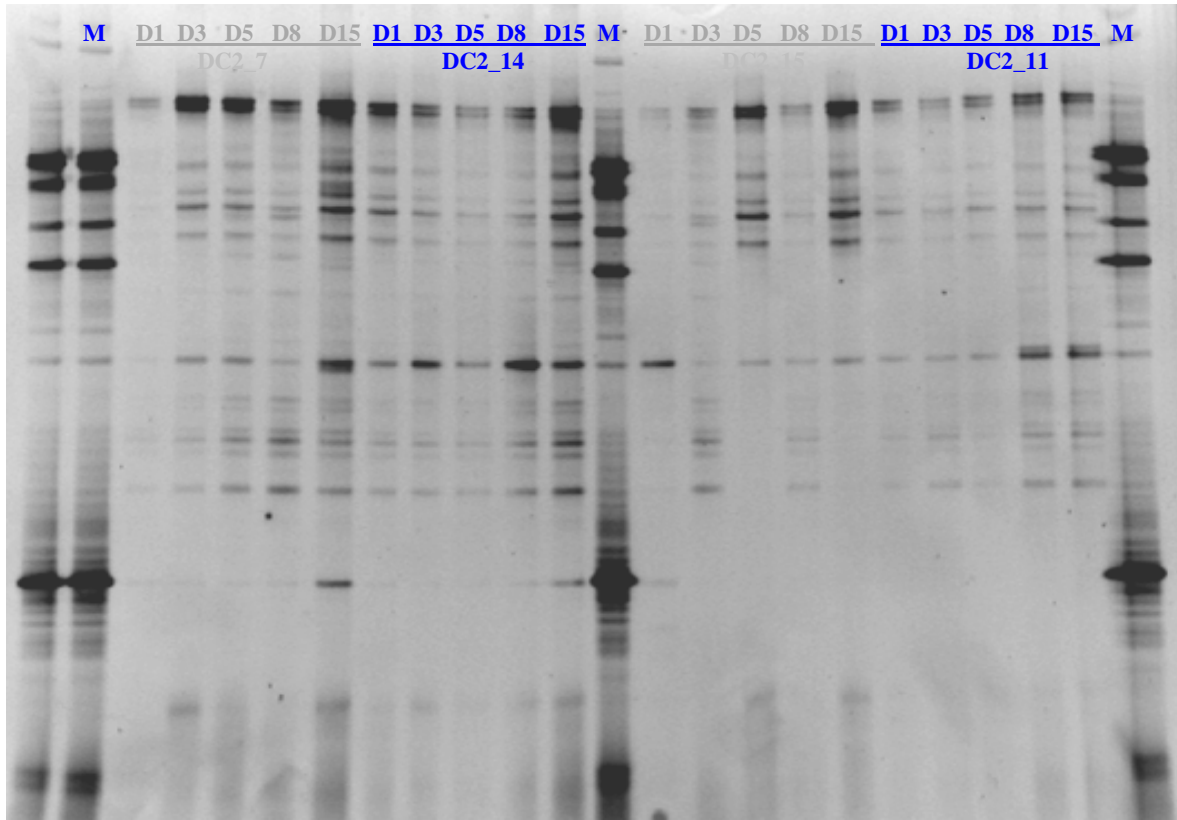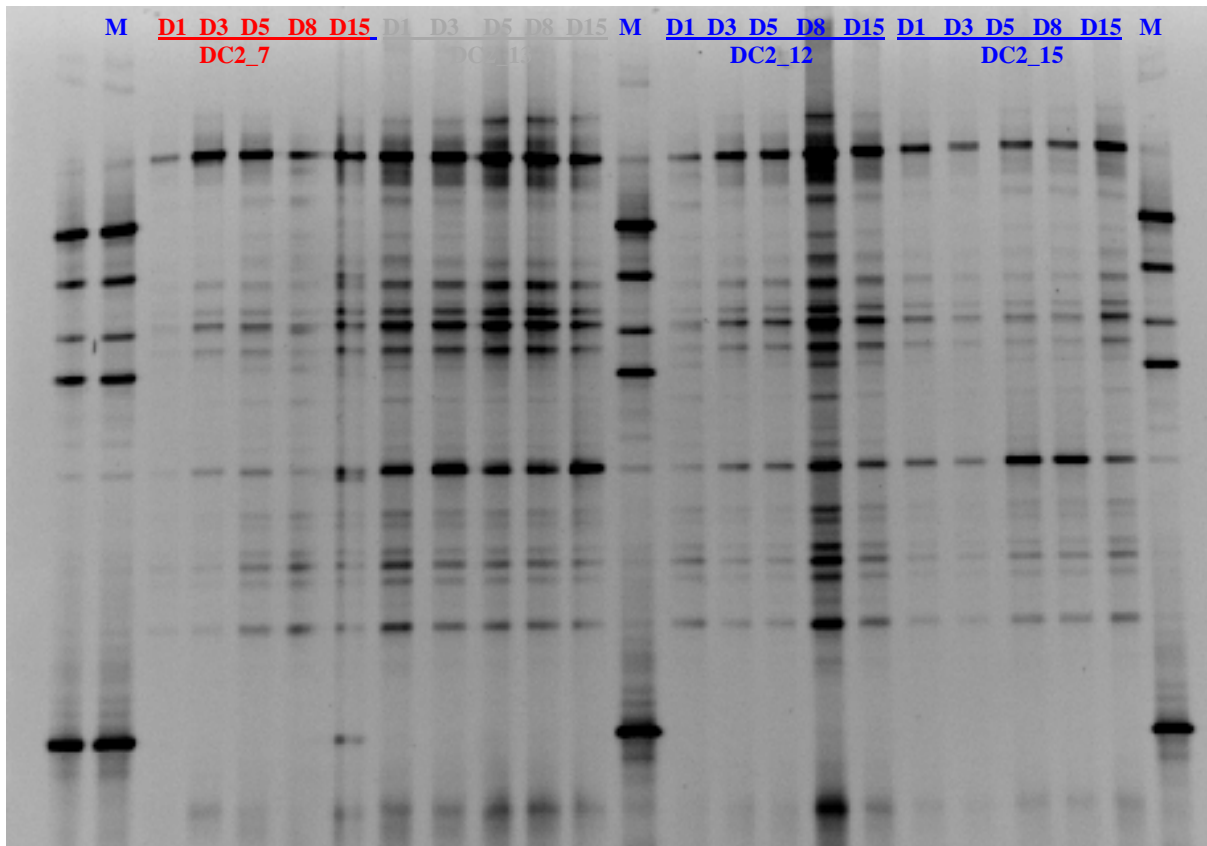

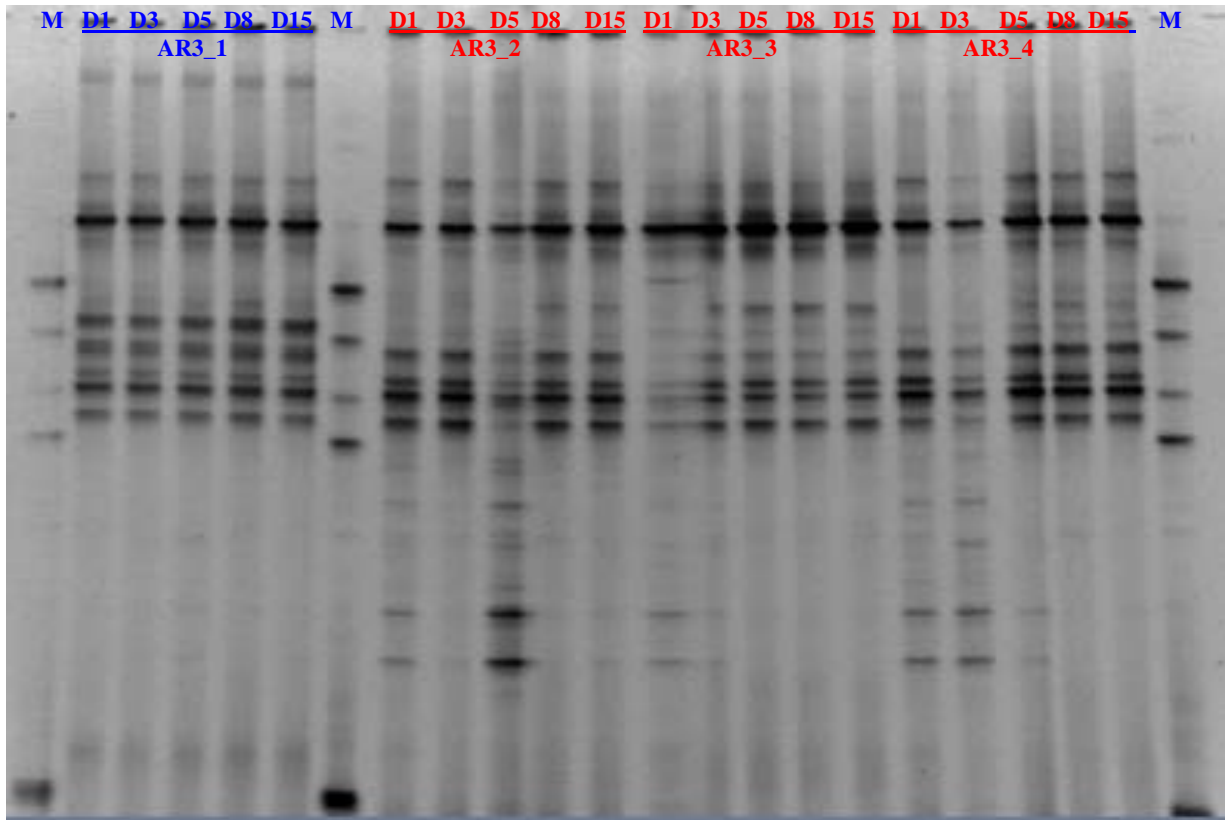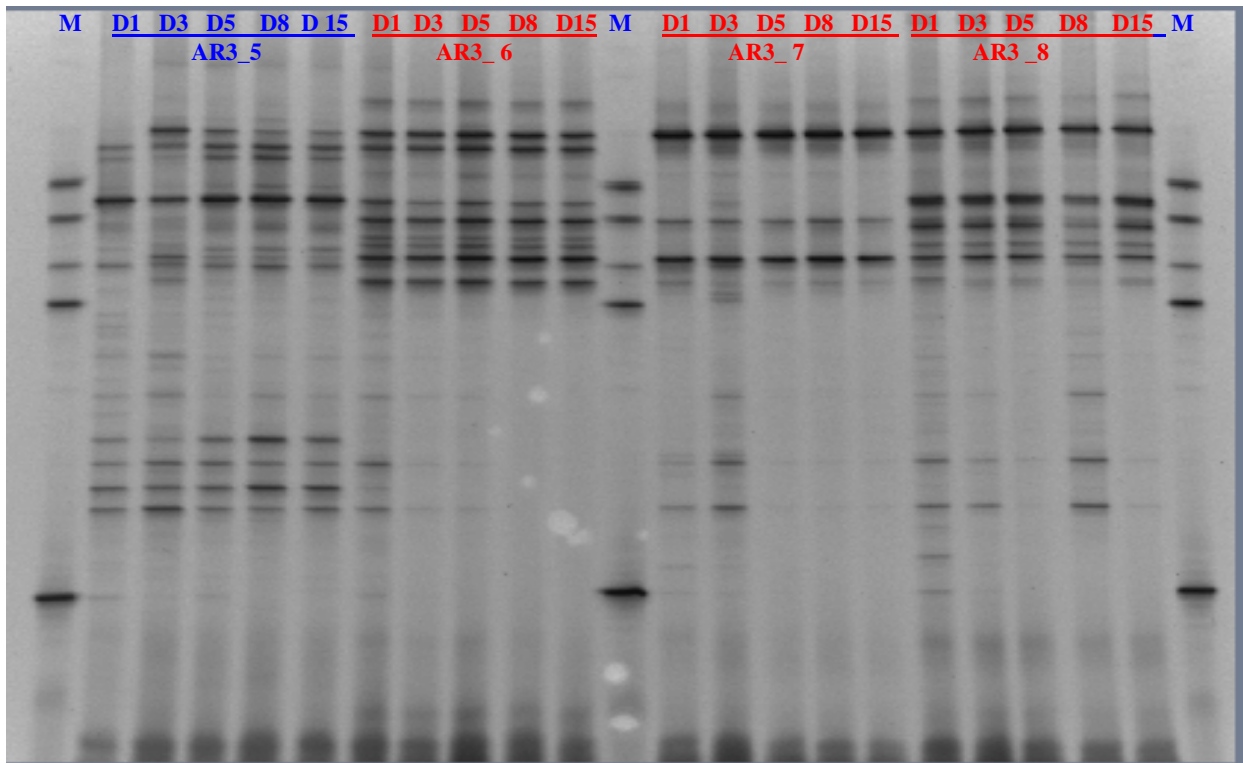



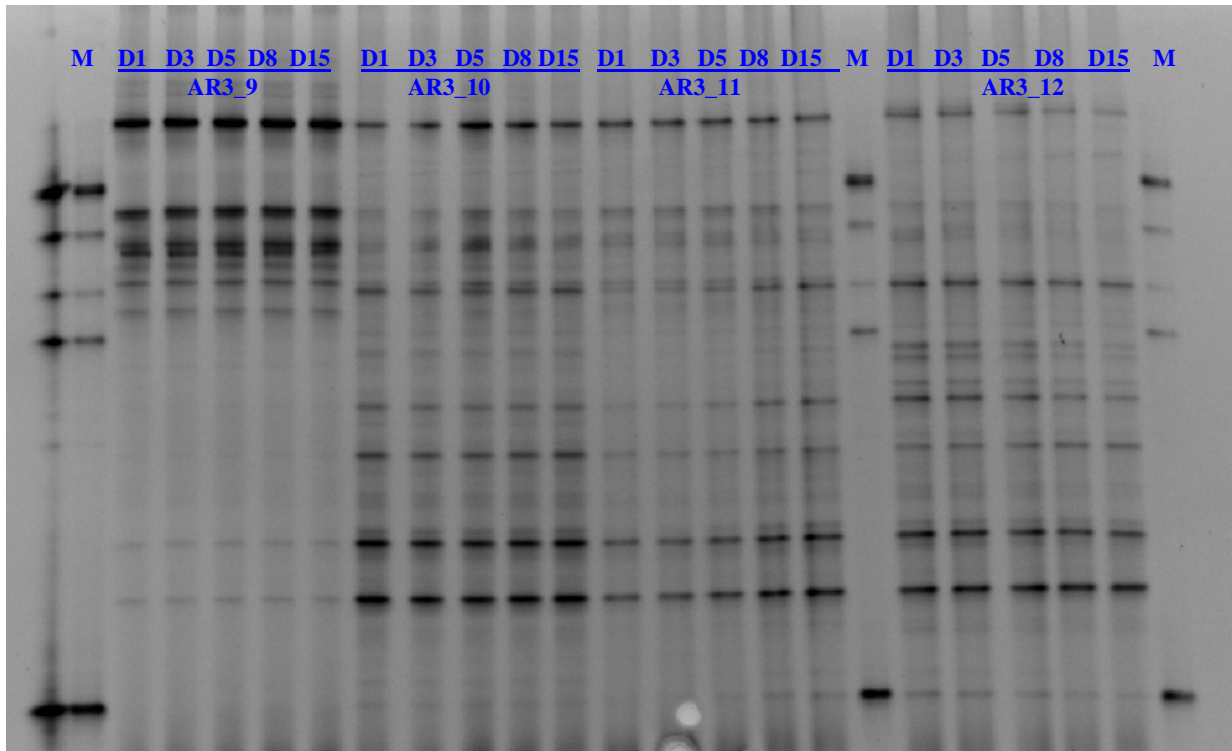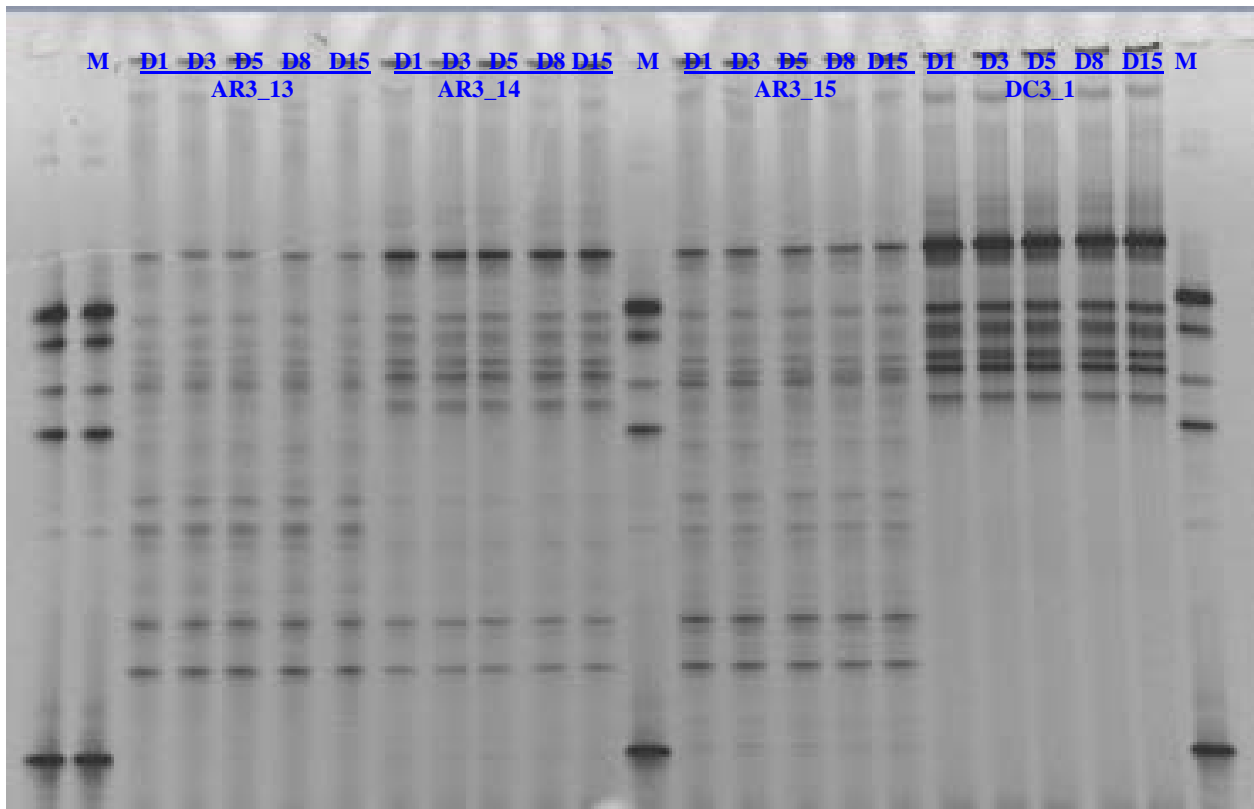

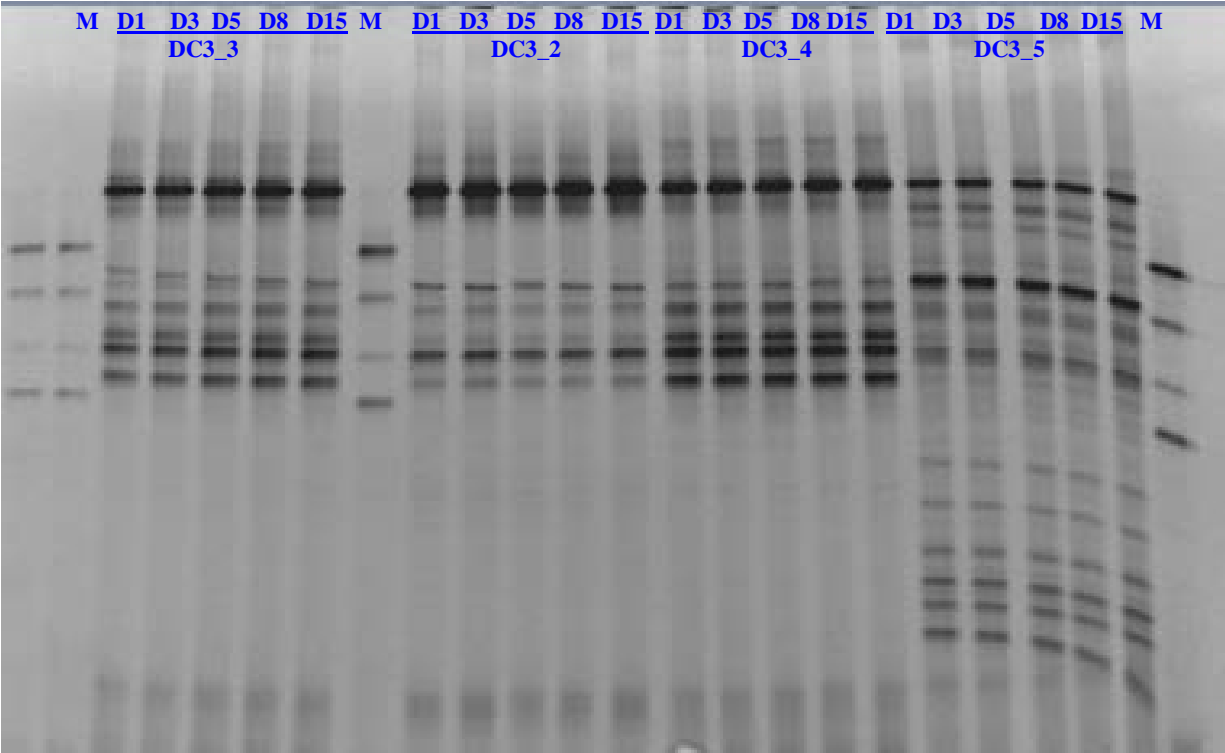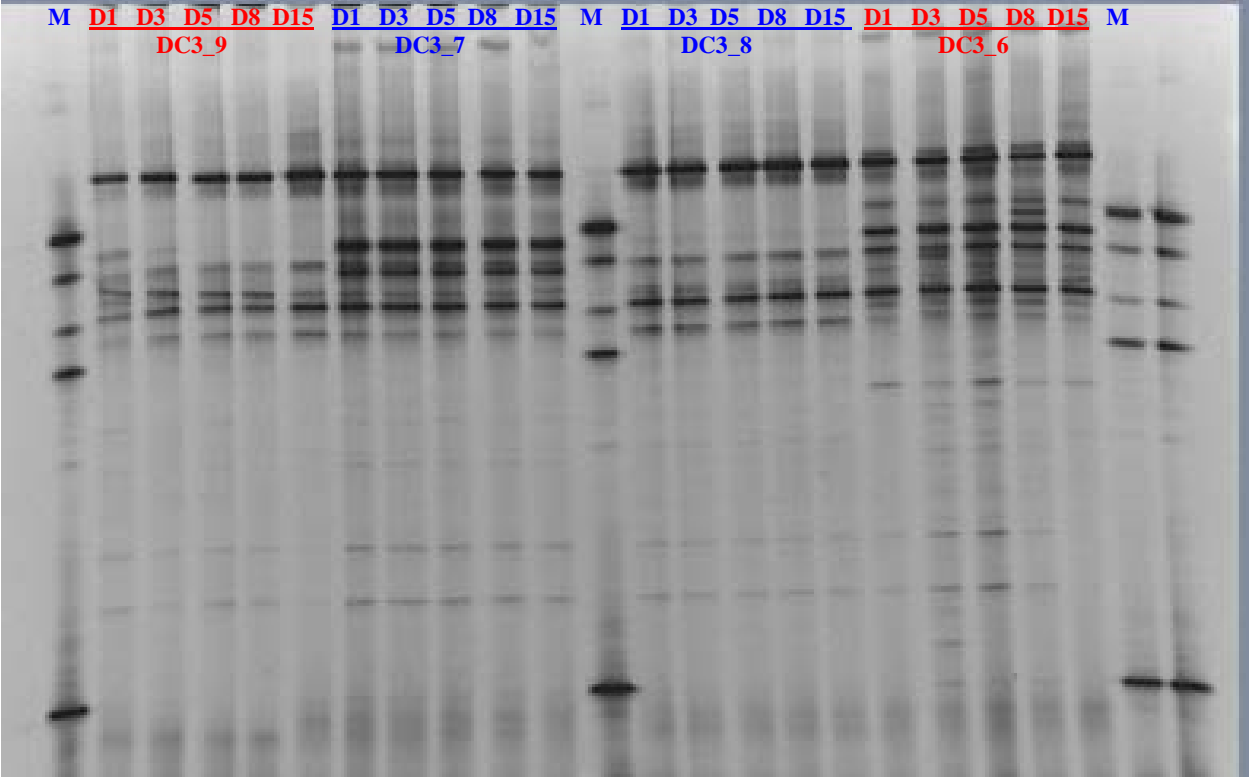

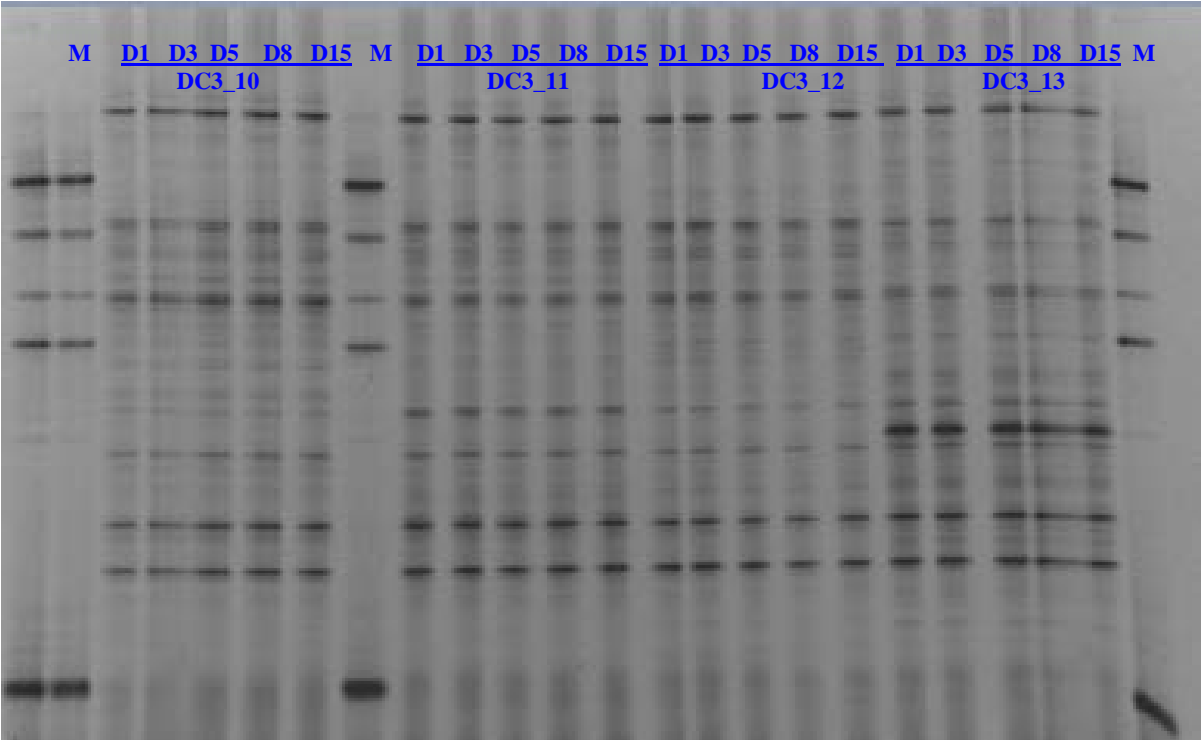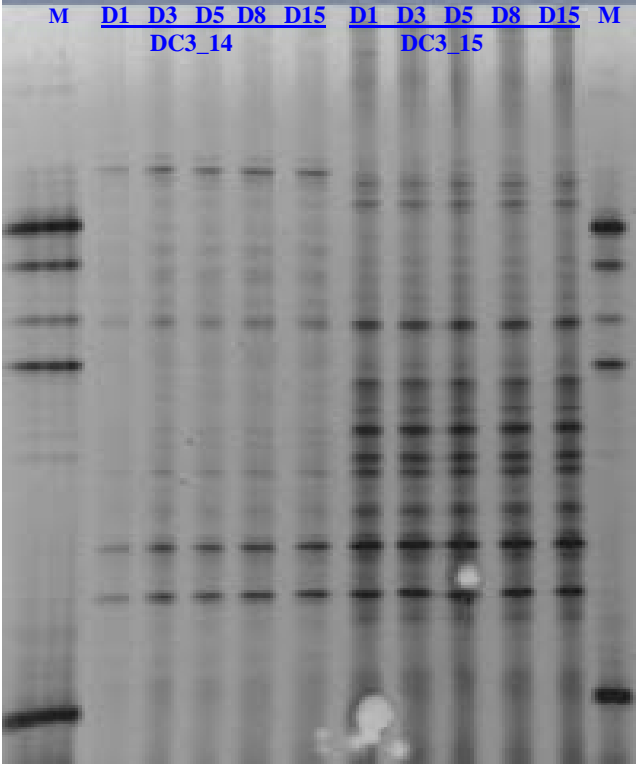

Supplement: AEM.01612-16_zam999117473so71.pdf [file AEM.01612-16_zam999117473so71.pdf]
